# Supplementary material for: Aerobic copper-catalyzed oxidative [6C+1C] annulation: an efficient route to seven-membered carbocycles
Source: Royal Society of Chemistry journal article supplement (doi:10.1039/c4cc03095h), 2014-01-01
Supplement: c4cc03095h1.pdf [file c4cc03095h1.pdf]

# Supporting Information

## **Aerobic Copper-Catalyzed Oxidative [6C+1C] Annulation: An Efficient Route to Seven-Membered Carbocycles\*\***

Xiao Liu, Lingjuan Zhang, Xianxiu Xu,\* Shan Wang, Ling Pan, Qian Zhang and Qun  
Liu\*

*Department of Chemistry, Northeast Normal University, Changchun 130024,  
People's Republic of China*

[xuux677@nenu.edu.cn](mailto:xuux677@nenu.edu.cn); [liuqun@nenu.edu.cn](mailto:liuqun@nenu.edu.cn)

### Table of Contents

|                                                                                             |     |
|---------------------------------------------------------------------------------------------|-----|
| I. General Information .....                                                                | S2  |
| II. Synthetic procedures and analytical data of Compounds <b>3</b> .....                    | S2  |
| III. Control Reactions.....                                                                 | S10 |
| IV. Copies of <sup>1</sup> H NMR and <sup>13</sup> C NMR spectra of compound <b>3</b> ..... | S13 |
| V. <sup>1</sup> H- <sup>1</sup> H NOESY spectrum of <b>3k</b> .....                         | S39 |
| VI. Crystal data and OPTEP drawing of compound <b>3g</b> .....                              | S39 |

## I. General Information

All reagents were purchased from commercial sources and used without further purification, unless otherwise indicated. *N,N*-Dimethylformamide (DMF) was dried over calcium hydride and distilled before use. All reactions were carried out in oven-dried flasks and monitored by TLC, which was performed on precoated aluminum sheets of silica gel 60 (F254). The products were purified by flash column chromatography on silica gel (300–400 mesh). Melting points were uncorrected. The  $^1\text{H}$  NMR and  $^{13}\text{C}$  NMR spectra were determined at 25°C on a 500 MHz and 125 MHz, respectively, and TMS as internal standard. All chemical shifts are given in ppm. High-resolution mass spectra (HRMS) were obtained using a Bruker microTOF II focus spectrometer (ESI).

## II. Synthetic procedures and analytical data of Compounds **3**

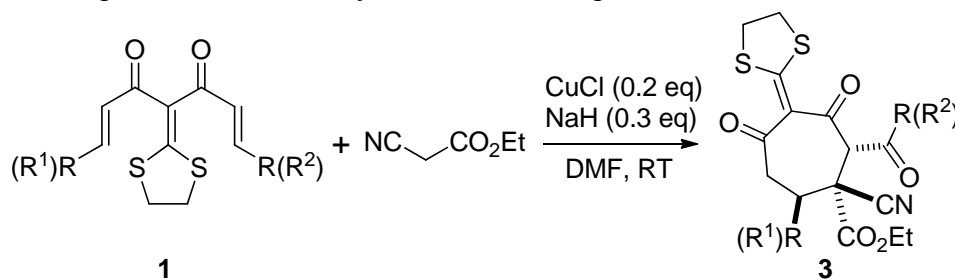

General procedure (**taking 3a as an example**):

To the solution of **1a** (R = 4-ClC<sub>6</sub>H<sub>4</sub>, 223.5 mg, 0.5 mmol) and ethyl 2-cyanoacetate (0.064 mL, 0.6 mmol) in anhydrous DMF (3 mL) was added NaH (60%, 6 mg, 0.15 mmol) and CuCl (10 mg, 0.1 mmol) at room temperature, then the reaction mixture was stirring under air atmosphere. After **1a** was consumed as indicated by TLC, the resulting mixture was poured into water (30 mL) and extracted with ethyl acetate (15 mL  $\times$  3). The combined organic phase was washed with water (15 mL  $\times$  3), dried over anhydrous MgSO<sub>4</sub> and concentrated in vacuo. The crude product was purified by column chromatography (silica gel, EtOAc/PE = 1: 10) to give **3a** (244 mg, 85%, 0.425 mmol) as a yellow solid.

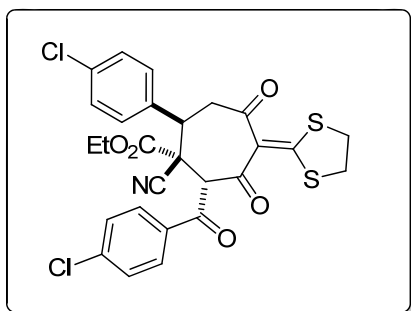

**3a**, Ethyl 2-(4-chlorobenzoyl)-7-(4-chlorophenyl)-1-cyano-4-(1,3-dithiolan-2-ylidene)-3,5-dioxocycloheptanecarboxylate. Yellow solid. m.p. 239–240°C.

**<sup>1</sup>H NMR** (500 MHz, CDCl<sub>3</sub>): δ 1.23(t, *J* = 7.0 Hz, 3H), 3.19 (d, *J* = 19.0 Hz, 1H), 3.27-3.37 (m, 2H), 3.50-3.56 (m, 2H), 3.70 (dd, *J*<sub>1</sub> = 19.0 Hz, *J*<sub>2</sub> = 7.5 Hz, 1H), 3.83 (d, *J* = 12.0 Hz, 1H), 4.20 (dd, *J*<sub>1</sub> = 10.5 Hz, *J*<sub>2</sub> = 3.5 Hz, 1H), 4.32 (dd, *J*<sub>1</sub> = 10.5 Hz, *J*<sub>2</sub> = 3.5 Hz, 1H), 5.17 (s, 1H), 7.18 (d, *J* = 8.5 Hz, 2H), 7.55 (d, *J* = 8.0 Hz, 2H), 7.39(d, *J* = 8.5 Hz, 2H), 7.67 (d, *J* = 8.0 Hz, 2H). **<sup>13</sup>C NMR** (125 MHz, CDCl<sub>3</sub>): δ 13.7, 37.2, 37.9, 45.2, 45.5, 53.8, 62.8, 63.2, 116.6, 124.6, 128.9, 129.2, 129.7, 129.8, 133.0, 134.8, 135.4, 140.5, 167.1, 184.2, 190.1, 190.8, 195.5. **HRMS** (ESI-TOF) Calcd for C<sub>27</sub>H<sub>22</sub>Cl<sub>2</sub>NO<sub>5</sub>S<sub>2</sub><sup>+</sup>, ([M + H]<sup>+</sup>) 574.0311. Found 574.0307.

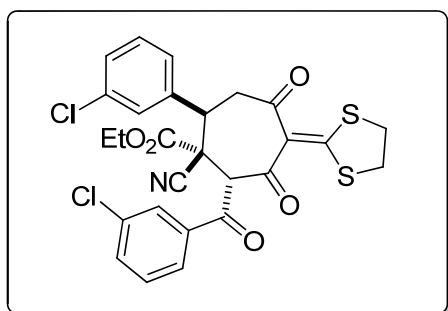

**3b**, Ethyl 2-(3-chlorobenzoyl)-7-(3-chlorophenyl)-1-cyano-4-(1,3-dithiolan-2-ylidene)-3,5-dioxocycloheptanecarboxylate. Yellow solid. m.p. 224–225°C.

**<sup>1</sup>H NMR** (500 MHz, CDCl<sub>3</sub>): δ 1.22 (t, *J* = 7.0 Hz, 3H), 3.23 (d, *J* = 19.0 Hz, 1H), 3.28-3.36 (m, 2H), 3.51-3.57 (m, 2H), 3.72 (dd, *J*<sub>1</sub> = 19.0 Hz, *J*<sub>2</sub> = 7.0 Hz, 1H), 3.83 (d, *J* = 11.5 Hz, 1H), 4.24-4.33 (m, 2H), 5.20 (s, 1H), 7.19 (d, *J* = 8.5 Hz, 2H), 7.34 (s, 1H), 7.37 (d, *J* = 8.0 Hz, 2H), 7.53 (d, *J* = 8.0 Hz, 1H), 7.56 (d, *J* = 8.0 Hz, 1H), 7.76 (s, 1H). **<sup>13</sup>C NMR** (125 MHz, CDCl<sub>3</sub>): δ 13.8, 37.3, 37.8, 45.0, 45.8, 53.7, 62.9, 63.3, 116.5,

124.7, 126.3, 126.4, 128.5, 128.8, 128.9, 130.1, 133.9, 134.4, 135.2, 136.2, 138.8, 167.0, 184.3, 190.3, 190.8, 195.2. **HRMS** (ESI-TOF) Calcd for  $C_{27}H_{22}Cl_2NO_5S_2^+$ , ( $[M + H]^+$ ) 574.0311. Found 574.0313.

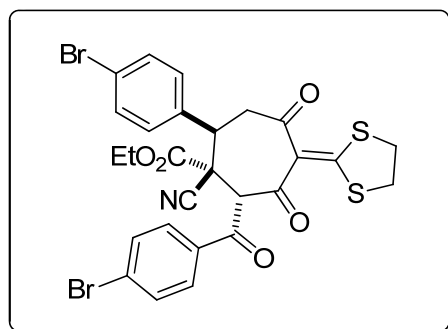

**3c**, Ethyl 2-(4-bromobenzoyl)-7-(4-bromophenyl)-1-cyano-4-(1,3-dithiolan-2-ylidene)-3,5-dioxocycloheptanecarboxylate. Yellow solid. m.p. 227–228°C.

**<sup>1</sup>H NMR** (500 MHz,  $CDCl_3$ ):  $\delta$  1.21 (t,  $J = 7.5$  Hz, 3H), 3.17 (d,  $J = 19.0$  Hz, 1H), 3.25–3.35 (m, 2H), 3.49–3.55 (m, 2H), 3.68 (dd,  $J_1 = 19.5$  Hz,  $J_2 = 7.5$  Hz, 1H), 3.80 (d,  $J = 12.0$  Hz, 1H), 4.15–4.21 (m, 1H), 4.28–4.34 (m, 1H), 5.15 (s, 1H), 7.10 (d,  $J = 8.0$  Hz, 2H), 7.48 (d,  $J = 8.5$  Hz, 2H), 7.54 (d,  $J = 8.5$  Hz, 2H), 7.58 (d,  $J = 8.5$  Hz, 2H). **<sup>13</sup>C NMR** (125 MHz,  $CDCl_3$ ):  $\delta$  13.8, 37.3, 37.9, 45.2, 45.7, 53.8, 62.8, 63.2, 116.6, 123.0, 124.7, 129.4, 129.7, 130.1, 131.9, 132.2, 133.5, 136.0, 167.0, 184.2, 190.3, 190.7, 195.5. **HRMS** (ESI-TOF) Calcd for  $C_{27}H_{22}Br_2NO_5S_2^+$ , ( $[M + H]^+$ ) 661.9301. Found 661.9298.

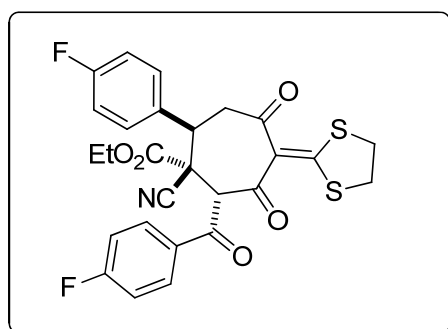

**3d**, Ethyl 1-cyano-4-(1,3-dithiolan-2-ylidene)-2-(4-fluorobenzoyl)-7-(4-fluorophenyl)-3,5-dioxocycloheptanecarboxylate. Yellow solid. m.p. 229–230°C.

**<sup>1</sup>H NMR** (500 MHz,  $CDCl_3$ ):  $\delta$  1.21 (t,  $J = 7.5$  Hz, 3H), 3.21 (d,  $J = 19.0$  Hz, 1H), 3.28–3.34 (m, 2H), 3.50–3.56 (m, 2H), 3.70 (dd,  $J_1 = 19.0$  Hz,  $J_2 = 7.0$  Hz, 1H), 3.85 (d,  $J$

= 12.0 Hz, 1H), 4.17-4.23 (m, 1H), 4.28-4.33 (m, 1H), 5.16 (s, 1H), 7.06-7.09 (m, 4H), 7.22-7.24 (m, 2H), 7.74-7.77 (m, 2H). **<sup>13</sup>C NMR** (125 MHz, CDCl<sub>3</sub>): δ 13.7, 37.2, 37.9, 45.5, 54.0, 62.8, 63.1, 115.7, 115.8, 116.1, 116.2, 116.7, 124.7, 130.1, 130.2, 131.0, 131.1, 132.8, 161.8, 163.8, 165.1, 167.1, 184.3, 189.6, 190.5, 195.7. **HRMS** (ESI-TOF) Calcd for C<sub>27</sub>H<sub>22</sub>F<sub>2</sub>NO<sub>5</sub>S<sub>2</sub><sup>+</sup>, ([M + H]<sup>+</sup>) 542.0902. Found 542.0908.

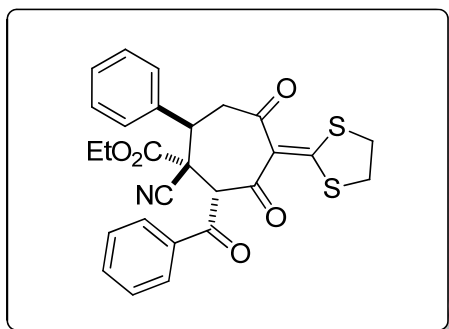

**3e**, Ethyl 2-benzoyl-1-cyano-4-(1,3-dithiolan-2-ylidene)-3,5-dioxo-7-phenylcycloheptanecarboxylate. Yellow solid. m.p. 230–231°C.

**<sup>1</sup>H NMR** (500 MHz, CDCl<sub>3</sub>): δ 1.18 (t, *J* = 7.0 Hz, 3H), 3.24-3.30 (m, 3H), 3.48-3.53 (m, 2H), 3.75 (dd, *J*<sub>1</sub> = 19.0 Hz, *J*<sub>2</sub> = 7.0 Hz, 1H), 3.86 (d, *J* = 12.0 Hz, 1H), 4.19-4.24 (m, 1H), 4.26-4.33 (m, 1H), 5.23 (s, 1H), 7.24-7.26 (m, 1H), 7.35-7.36 (m, 3H), 7.42 (t, *J* = 7.5 Hz, 3H), 7.55 (t, *J* = 7.5 Hz, 1H), 7.74 (d, *J* = 7.5 Hz, 2H). **<sup>13</sup>C NMR** (125 MHz, CDCl<sub>3</sub>): δ 13.7, 37.1, 37.8, 45.4, 46.2, 54.0, 62.8, 63.0, 116.9, 124.9, 128.3, 128.4, 128.7, 128.9, 133.9, 134.7, 137.0, 167.3, 184.5, 190.0, 191.2, 196.1. **HRMS** (ESI-TOF) Calcd for C<sub>27</sub>H<sub>24</sub>NO<sub>5</sub>S<sub>2</sub><sup>+</sup>, ([M + H]<sup>+</sup>) 506.1090. Found 506.1099.

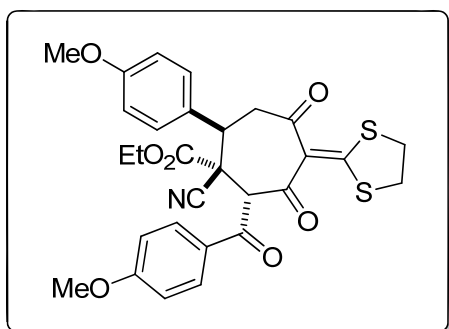

**3f**, Ethyl 1-cyano-4-(1,3-dithiolan-2-ylidene)-2-(4-methoxybenzoyl)-7-(4-methoxyphenyl)-3,5-dioxocycloheptanecarboxylate. Yellow solid. m.p. 278–279°C.

**<sup>1</sup>H NMR** (500 MHz, CDCl<sub>3</sub>): δ 1.21 (t, *J* = 7.0 Hz, 3H), 3.20 (d, *J* = 19.0 Hz, 1H), 3.24-3.31 (m, 2H), 3.47-3.50 (m, 2H), 3.71 (dd, *J*<sub>1</sub> = 19.0 Hz, *J*<sub>2</sub> = 7.0 Hz, 1H), 3.80 (s, 3H), 3.83 (d, *J* = 12.5 Hz, 1H), 3.84 (s, 3H), 4.18-4.24 (m, 1H), 4.27-4.33 (m, 1H), 5.17 (s, 1H), 6.86-6.88 (m, 4H), 7.16 (d, *J* = 9.0 Hz, 2H), 7.70 (d, *J* = 9.0 Hz, 2H). **<sup>13</sup>C NMR** (125 MHz, CDCl<sub>3</sub>): δ 13.8, 37.1, 37.8, 45.5, 45.7, 54.3, 55.3, 55.5, 62.7, 62.9, 114.0, 114.1, 117.1, 125.0, 127.8, 129.0, 129.2, 129.6, 130.8, 159.7, 164.1, 167.4, 184.8, 189.6, 196.3. **HRMS** (ESI-TOF) Calcd for C<sub>29</sub>H<sub>28</sub>NO<sub>7</sub>S<sub>2</sub><sup>+</sup>, ([M + H]<sup>+</sup>) 566.1302. Found 566.1299.

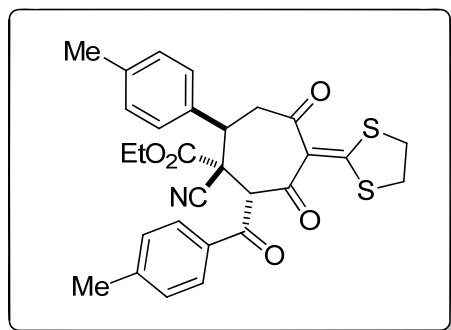

**3g**, Ethyl 1-cyano-4-(1, 3-dithiolan-2-ylidene)-2-(4-methylbenzoyl)-3, 5-dioxo-7-(p-tolyl)cycloheptanecarboxylate. Yellow solid. m.p.186–187°C.

**<sup>1</sup>H NMR** (500 MHz, CDCl<sub>3</sub>): δ 1.20 (t, *J* = 7.0 Hz, 3H), 2.34 (s, 3H), 2.37 (s, 3H), 3.22 (d, *J* = 19.0 Hz, 1H), 3.25-3.32 (m, 2H), 3.46-3.52 (m, 2H), 3.73 (dd, *J*<sub>1</sub> = 19.0 Hz, *J*<sub>2</sub> = 7.0 Hz, 1H), 3.81 (d, *J* = 11.5 Hz, 1H), 4.18-4.24 (m, 1H), 4.27-4.33 (m, 1H), 5.23 (s, 1H), 7.12 (d, *J* = 7.5 Hz, 2H), 7.15 (d, *J* = 7.5 Hz, 2H), 7.19 (d, *J* = 8.0 Hz, 2H), 7.64 (d, *J* = 8.0 Hz, 2H). **<sup>13</sup>C NMR** (125 MHz, CDCl<sub>3</sub>): δ 13.7, 21.1, 21.7, 37.1, 37.8, 45.5, 45.7, 54.1, 62.7, 62.8, 116.9, 124.9, 128.2, 128.5, 129.3, 129.5, 132.2, 134.0, 138.4, 144.9, 167.4, 184.7, 189.7, 190.8, 196.2. **HRMS** (ESI-TOF) Calcd for C<sub>29</sub>H<sub>28</sub>NO<sub>5</sub>S<sub>2</sub><sup>+</sup>, ([M + H]<sup>+</sup>) 534.1403. Found 534.1411.

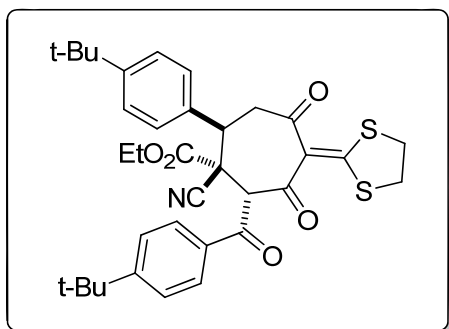

**3h**, Ethyl 2-(4-(tert-butyl) benzoyl)-7-(4-(tert-butyl) phenyl)-1-cyano-4-(1,3-dithiolan-2-ylidene)-3,5-dioxocycloheptanecarboxylate. Yellow solid. m.p. 198–199°C.  $^1\text{H NMR}$  (500 MHz,  $\text{CDCl}_3$ ):  $\delta$  1.12 (t,  $J = 7.5$  Hz, 3H), 1.29 (s, 9H), 1.30 (s, 9H), 3.22 (d,  $J = 18.5$  Hz, 2H), 3.28–3.33 (m, 1H), 3.46–3.50 (m, 2H), 3.74 (dd,  $J_1 = 17.5$  Hz,  $J_2 = 6.5$  Hz, 1H), 3.83 (d,  $J = 12.0$  Hz, 1H), 4.22–4.28 (m, 2H), 5.27–5.29 (m, 1H), 7.17 (d,  $J = 8.0$  Hz, 2H), 7.36 (d,  $J = 8.5$  Hz, 2H), 7.41 (d,  $J = 8.0$  Hz, 2H), 7.70 (d,  $J = 8.0$  Hz, 2H).  $^{13}\text{C NMR}$  (125 MHz,  $\text{CDCl}_3$ ):  $\delta$  13.5, 30.9, 31.1, 34.4, 35.1, 37.0, 37.8, 45.3, 45.7, 54.0, 62.6 (2), 116.9, 124.8, 125.4, 125.7, 128.0, 128.3, 131.9, 133.9, 151.4, 157.6, 167.3, 184.6, 189.6, 190.8, 196.3. **HRMS** (ESI-TOF) Calcd for  $\text{C}_{35}\text{H}_{40}\text{NO}_5\text{S}_2^+$ , ( $[\text{M} + \text{H}]^+$ ) 618.2342. Found 618.2350.

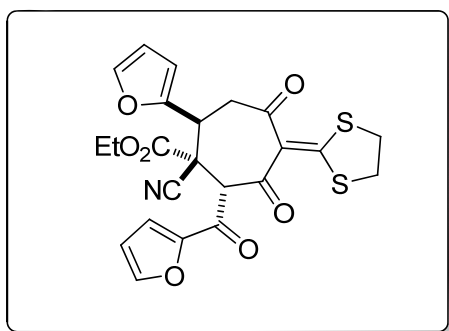

**3i**, Ethyl 1-cyano-4-(1,3-dithiolan-2-ylidene)-2-(furan-2-carbonyl)-7-(furan-2-yl)-3,5-dioxocycloheptanecarboxylate. Yellow solid. m.p. 247–248°C.  $^1\text{H NMR}$  (500 MHz,  $\text{CDCl}_3$ ):  $\delta$  1.32 (t,  $J = 7.0$  Hz, 3H), 3.28 (d,  $J = 19.5$  Hz, 1H), 3.24–3.33 (m, 2H), 3.49–3.54 (m, 2H), 3.58 (dd,  $J_1 = 19.5$  Hz,  $J_2 = 7.5$  Hz, 1H), 4.02 (d,  $J = 12.0$  Hz, 1H), 4.36 (dd,  $J_1 = 14.0$  Hz,  $J_2 = 7.0$  Hz, 2H), 5.10 (s, 1H), 6.32 (d,  $J = 3.0$  Hz, 1H), 6.36–6.38 (m, 1H), 6.53–6.55 (m, 1H), 7.28 (d,  $J = 3.0$  Hz, 1H), 7.39 (s, 1H), 7.48 (s, 1H).  $^{13}\text{C NMR}$  (125 MHz,  $\text{CDCl}_3$ ):  $\delta$  13.7, 37.0, 37.8, 40.8, 43.1, 51.8, 62.1, 63.2, 108.7,

110.6, 113.0, 116.4, 118.4, 124.7, 142.8, 146.8, 150.1, 151.0, 166.9, 180.0, 183.7, 189.6, 195.3. **HRMS** (ESI-TOF) Calcd for  $C_{23}H_{20}NO_7S_2^+$ , ( $[M + H]^+$ ) 486.0676. Found 486.0682.

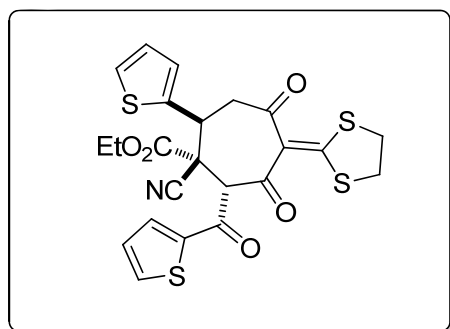

**3j**, Ethyl 1-cyano-4-(1,3-dithiolan-2-ylidene)-3,5-dioxo-7-(thiophen-2-yl)

-2-(thiophene-2-carbonyl)cycloheptanecarboxylate. Yellow solid. m.p. 245–246°C.

**<sup>1</sup>H NMR** (500 MHz,  $CDCl_3$ ):  $\delta$  1.17 (t,  $J = 7.0$  Hz, 3H), 3.25 (d,  $J = 20.0$  Hz, 1H), 3.20-3.30 (m, 2H), 3.43-3.48 (m, 2H), 3.65 (dd,  $J_1 = 19.5$  Hz,  $J_2 = 7.5$  Hz, 1H), 4.11 (d,  $J = 11.5$  Hz, 1H), 4.18-4.23 (m, 1H), 4.25-4.30 (m, 1H), 5.02 (s, 1H), 6.94 (t,  $J = 4.0$  Hz, 1H), 6.98 (d,  $J = 3.0$  Hz, 1H), 7.00 (t,  $J = 4.5$  Hz, 1H), 7.21 (d,  $J = 5.0$  Hz, 1H), 7.34 (d,  $J = 4.0$  Hz, 1H), 7.60 (d,  $J = 4.5$  Hz, 1H). **<sup>13</sup>C NMR** (125 MHz,  $CDCl_3$ ):  $\delta$  13.7, 37.2, 37.9, 42.2, 46.4, 54.3, 63.3, 63.6, 116.8, 124.7, 125.7, 127.1 (2), 128.3, 132.6, 135.2, 138.5, 141.9, 166.8, 183.5, 183.9, 189.7, 195.4. **HRMS** (ESI-TOF) Calcd for  $C_{23}H_{20}NO_5S_4^+$ , ( $[M + H]^+$ ) 518.0219. Found 518.0230.

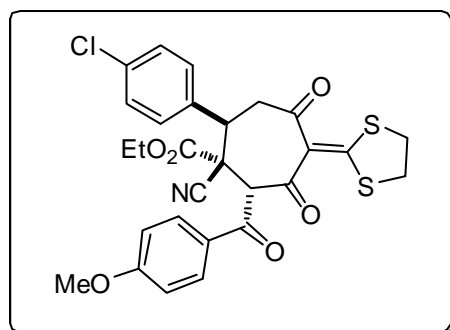

**3k**, Ethyl 2-(4-chlorobenzoyl)-1-cyano-4-(1,3-dithiolan-2-ylidene)-7-

(4-methoxyphenyl)-3,5-dioxocycloheptanecarboxylate. Yellow solid. m.p. 285–286°C.

**<sup>1</sup>H NMR** (500 MHz,  $CDCl_3$ ):  $\delta$  1.22 (t,  $J = 7.5$  Hz, 3H), 3.18 (d,  $J = 19.0$  Hz, 1H),



3.23-3.35 (m, 2H), 3.48-3.54 (m, 2H), 3.71 (dd,  $J_1 = 19.0$  Hz,  $J_2 = 7.0$  Hz, 1H), 3.83 (d,  $J = 11.5$  Hz, 1H), 3.85 (s, 3H), 4.18-4.24 (m, 1H), 4.28-4.34 (m, 1H), 5.17 (s, 1H), 6.88 (d,  $J = 8.5$  Hz, 2H), 7.18 (d,  $J = 8.5$  Hz, 2H), 7.34 (d,  $J = 8.5$  Hz, 2H), 7.70 (d,  $J = 8.5$  Hz, 2H).  $^{13}\text{C}$  NMR (125 MHz,  $\text{CDCl}_3$ ):  $\delta$  13.8, 37.1, 37.8, 45.3, 45.5, 53.9, 55.5, 62.5, 63.1, 114.1, 116.7, 124.8, 127.6, 128.9, 129.8, 130.8, 134.7, 135.6, 164.1, 167.3, 184.6, 189.4, 190.1, 195.7. **HRMS** (ESI-TOF) Calcd for  $\text{C}_{28}\text{H}_{25}\text{ClNO}_6\text{S}_2^+$ , ( $[\text{M} + \text{H}]^+$ ) 570.0806. Found 570.0800.

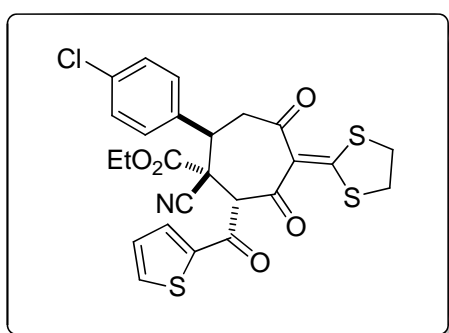

**3I**, Ethyl 7-(4-chlorophenyl)-1-cyano-4-(1,3-dithiolan-2-ylidene)-3,5-dioxo

-2-(thiophene-2-carbonyl)cycloheptanecarboxylate. Yellow solid. m.p. 253–254°C.

$^1\text{H}$  NMR (500 MHz,  $\text{CDCl}_3$ ):  $\delta$  1.21 (t,  $J = 7.5$  Hz, 3H), 3.18 (d,  $J = 19.0$  Hz, 1H), 3.28-3.33 (m, 2H), 3.51-3.55 (m, 2H), 3.69 (dd,  $J_1 = 19.5$  Hz,  $J_2 = 7.0$  Hz, 1H), 3.84 (d,  $J = 11.5$  Hz, 1H), 4.19-4.23 (m, 1H), 4.28-4.32 (m, 1H), 5.09 (s, 1H), 7.08 (t,  $J = 4.5$  Hz, 1H), 7.18 (d,  $J = 8.5$  Hz, 2H), 7.34 (d,  $J = 8.5$  Hz, 2H), 7.41 (d,  $J = 3.5$  Hz, 1H), 7.68 (d,  $J = 5.0$  Hz, 1H).  $^{13}\text{C}$  NMR (125 MHz,  $\text{CDCl}_3$ ):  $\delta$  13.7, 37.2, 37.9, 45.2, 45.6, 53.8, 63.2, 63.6, 116.5, 124.8, 128.3, 128.9, 129.8, 132.6, 134.8, 135.2, 135.4, 141.9, 166.9, 183.6, 184.1, 190.1, 195.5. **HRMS** (ESI-TOF) Calcd for  $\text{C}_{25}\text{H}_{21}\text{ClNO}_5\text{S}_3^+$ , ( $[\text{M} + \text{H}]^+$ ) 546.0265. Found 546.0258.

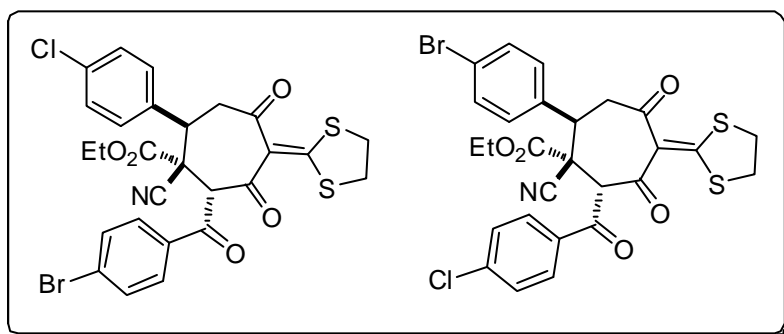

**3m**, Ethyl 2-(4-bromobenzoyl)-7-(4-chlorophenyl)-1-cyano-4-(1,3-dithiolan-2-ylidene)-3,5-dioxocycloheptanecarboxylate.

**3m'**, Ethyl 7-(4-bromophenyl)-2-(4-chlorobenzoyl)-1-cyano-4-(1,3-dithiolan-2-ylidene)-3,5-dioxocycloheptanecarboxylate.

**3m/3m'** = 1.0/1.0. Yellow solid. m.p. 239–240°C. <sup>1</sup>H NMR (500 MHz, CDCl<sub>3</sub>): δ 1.22 (t, *J* = 7.0 Hz, 3H), 1.26 (t, *J* = 7.5 Hz, 3H), 3.16–3.20 (m, 2H), 3.26–3.33 (m, 4H), 3.50–3.54 (m, 4H), 3.70 (dd, *J*<sub>1</sub> = 19.5 Hz, *J*<sub>2</sub> = 7.5 Hz, 2H), 3.80–3.84 (m, 2H), 4.16–4.23 (m, 2H), 4.29–4.34 (m, 2H), 5.18 (s, 1H), 5.19 (s, 1H), 7.11 (d, *J* = 8.5 Hz, 2H), 7.17 (d, *J* = 8.5 Hz, 2H), 7.34 (d, *J* = 8.0 Hz, 2H), 7.38 (d, *J* = 8.5 Hz, 2H), 7.49 (d, *J* = 8.5 Hz, 2H), 7.55 (d, *J* = 8.5 Hz, 2H), 7.60 (d, *J* = 8.5 Hz, 2H), 7.68 (d, *J* = 8.5 Hz, 2H). <sup>13</sup>C NMR (125 MHz, CDCl<sub>3</sub>): δ 13.7, 37.2, 37.8, 45.1, 45.2, 45.5, 45.6, 53.7, 53.8, 62.6, 62.7, 63.1, 116.6, 122.9, 124.6, 128.9, 129.2, 129.6, 129.7, 130.0, 131.8, 132.2, 132.9, 133.4, 134.7, 135.4, 135.9, 140.5, 167.1, 184.2, 190.2, 190.4, 190.7 (2), 195.4, 195.5. HRMS (ESI-TOF) Calcd for C<sub>27</sub>H<sub>22</sub>BrClNO<sub>5</sub>S<sub>2</sub><sup>+</sup>, ([M + H]<sup>+</sup>) 617.9806. Found 617.9809.

### III. Control Reactions

All reactions were carried out in oven- or flame-dried glassware at 25 °C.

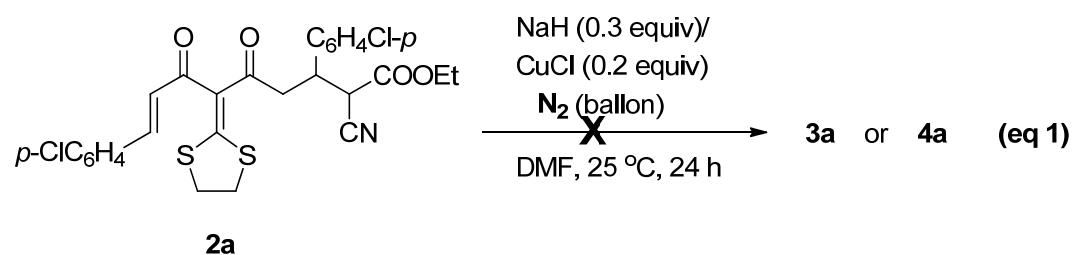

Procedure:

The reaction was carried out under N<sub>2</sub> atmosphere. To a stirring suspension of **2a** (280 mg, 0.5 mmol) in anhydrous DMF (2.5 mL) was added 60% NaH (6 mg, 0.15 mmol) and CuCl (10 mg, 0.1 mmol). After 24 hours of continues agitation, 15 mL water was added to quench the reaction. The product extracted with ethyl acetate (15 mL × 3) and the organic phase was washed with water (15 mL × 3), dried over anhydrous MgSO<sub>4</sub> and concentrated in vacuo. The crude product was a complex mixture without **3a** or **4a**.

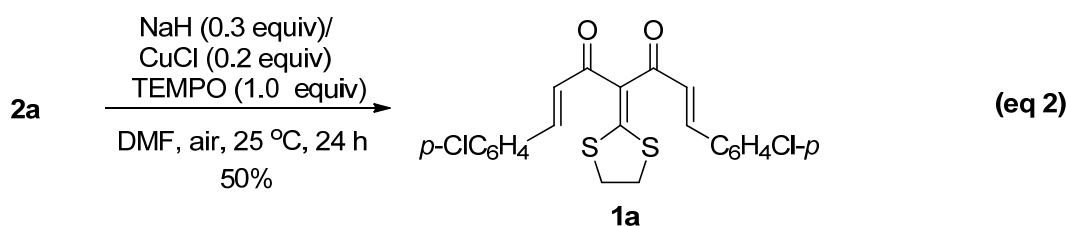

Procedure:

The reaction was carried out under air atmosphere. To a stirring suspension of **2a** (280 mg, 0.5 mmol) in anhydrous DMF (2.5 mL) was added 60% NaH (6 mg, 0.15 mmol), CuCl (10 mg, 0.1 mmol) and 2,2,6,6-Tetramethylpiperidine (71 mg, 0.5 mmol). After 24 hours of continues agitation, 15 mL water was added to quench the reaction. The product extracted with ethyl acetate (15 mL  $\times$  3) and the organic phase was washed with water (15 mL  $\times$  3), dried over anhydrous MgSO<sub>4</sub> and concentrated in vacuo. The crude product was purified by column chromatography (silica gel, EtOAc/PE = 1: 10) to give **1a** (110 mg, 50%).

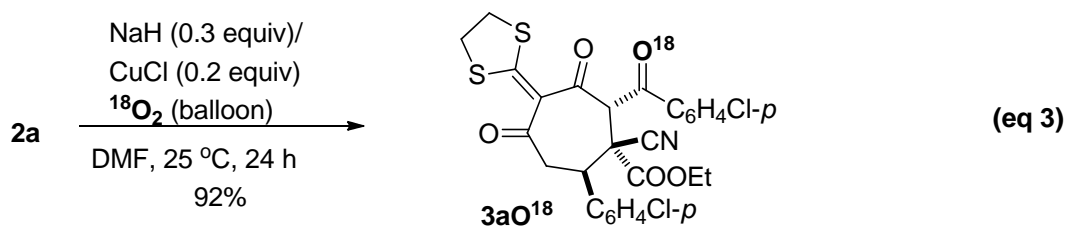

Procedure:

The reaction was carried out under <sup>18</sup>O<sub>2</sub> atmosphere. To a stirring suspension of **2a** (280 mg, 0.5 mmol) in anhydrous DMF (2.5 mL) was added 60% NaH (6 mg, 0.15 mmol), CuCl (10 mg, 0.1 mmol). After 24 hours of continues agitation, 15 mL water was added to quench the reaction. The product extracted with ethyl acetate (15 mL  $\times$  3) and the organic phase was washed with water (15 mL  $\times$  3), dried over anhydrous MgSO<sub>4</sub> and concentrated in vacuo. The crude product was purified by column chromatography (silica gel, EtOAc/PE = 1: 10) to give **3aO<sup>18</sup>** (264 mg, 92%, 0.46 mmol). The product **3aO<sup>18</sup>** was analyzed by mass spectroscopy, and the molecular ion at [M + H<sup>+</sup>] = 576 proves incorporation of one <sup>18</sup>O atoms.

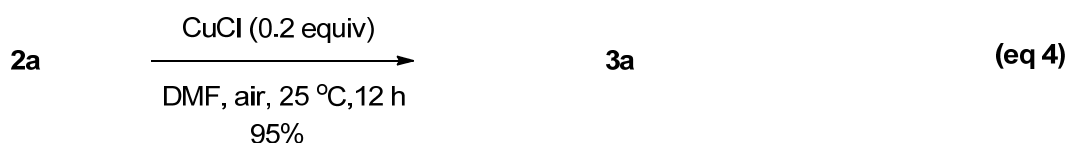

Procedure:

The reaction was carried out under air atmosphere. To a stirring suspension of **2a** (280 mg, 0.5 mmol) in anhydrous DMF (2.5 mL) was added CuCl (10 mg, 0.1 mmol). After 24 hours of continues agitation, 15 mL water was added to quench the reaction. The product extracted with ethyl acetate (15 mL  $\times$  3) and the organic phase was washed with water (15 mL  $\times$  3), dried over anhydrous MgSO<sub>4</sub> and concentrated in vacuo. The crude product was purified by column chromatography (silica gel, EtOAc/PE = 1: 10) to give **3a** (273 mg, 95%, 0.48 mmol).

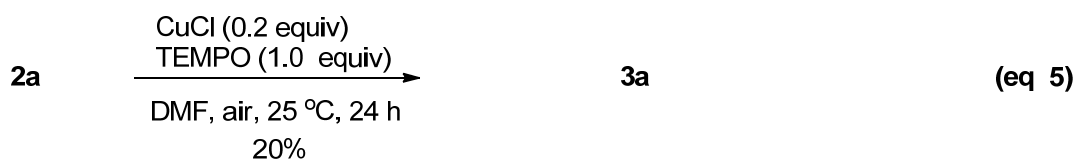

Procedure:

The reaction was carried out under air atmosphere. To a stirring suspension of **2a** (280 mg, 0.5 mmol) in anhydrous DMF (2.5 mL) was added CuCl (10 mg, 0.1 mmol) and 2,2,6,6-Tetramethylpiperidine (71 mg, 0.5 mmol). After 24 hours of continues agitation, 15 mL water was added to quench the reaction. The product extracted with ethyl acetate (15 mL  $\times$  3) and the organic phase was washed with water (15 mL  $\times$  3), dried over anhydrous MgSO<sub>4</sub> and concentrated in vacuo. The crude product was purified by column chromatography (silica gel, EtOAc/PE = 1: 10) to give **3a** (58 mg, 20%, 0.10 mmol).

IV. Copies of  $^1\text{H}$  NMR and  $^{13}\text{C}$  NMR spectra of compound **3**

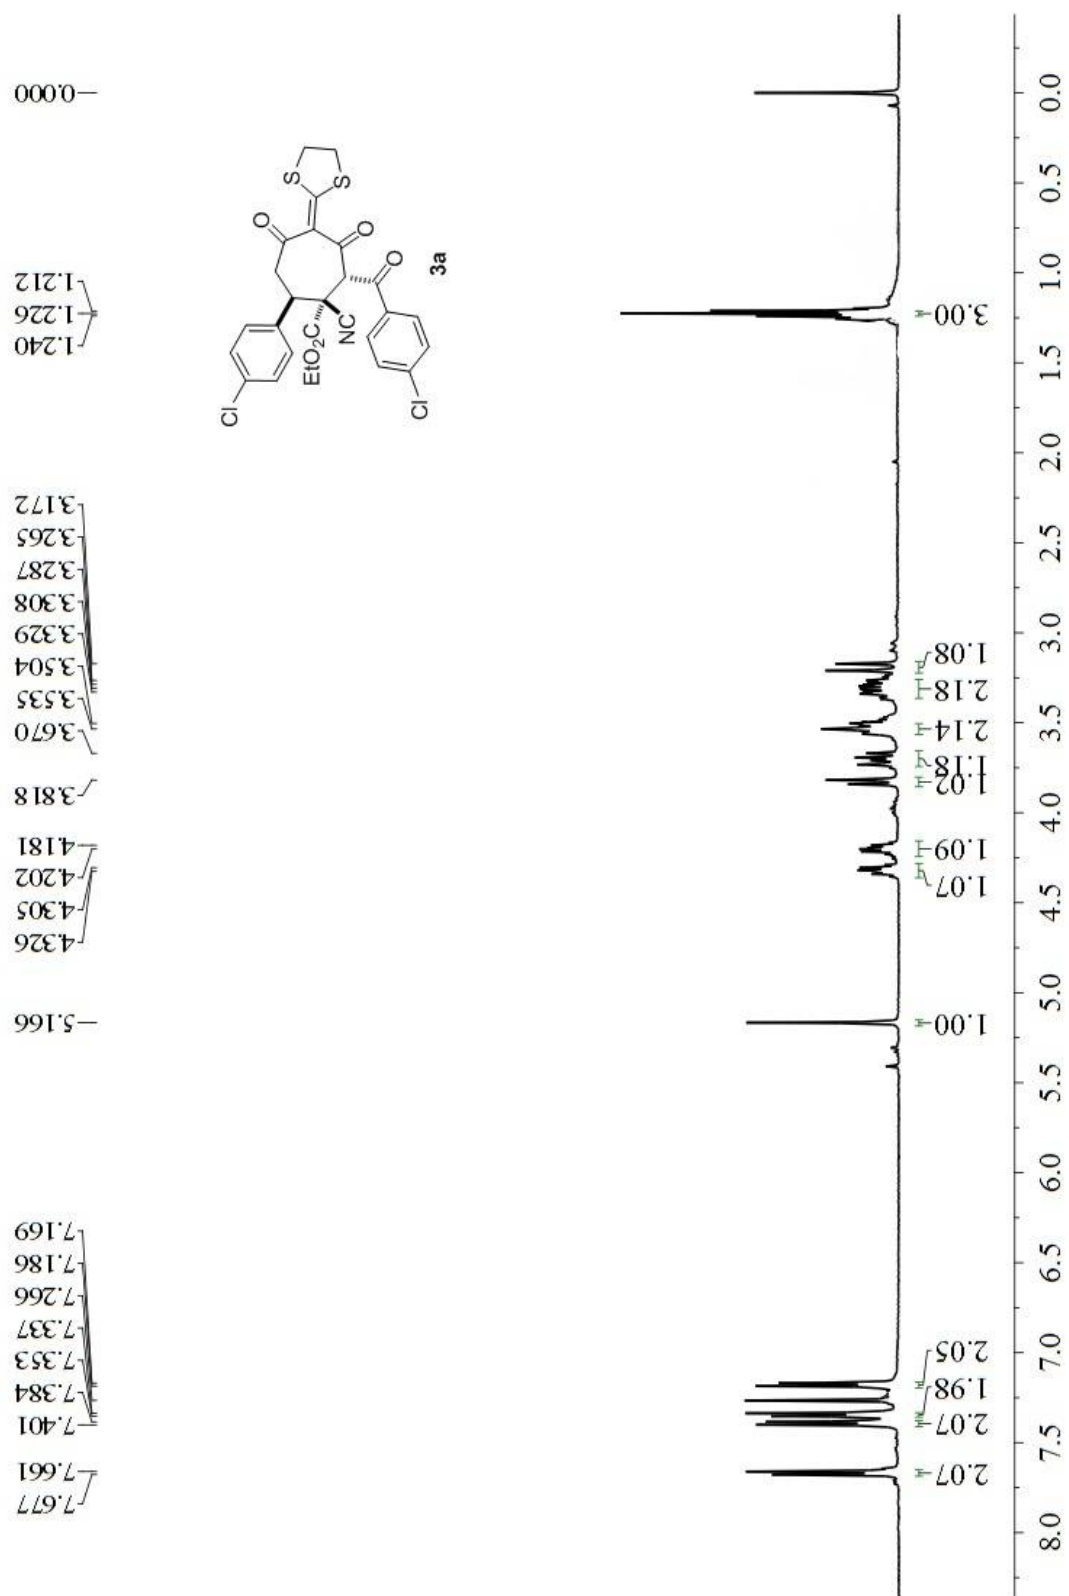

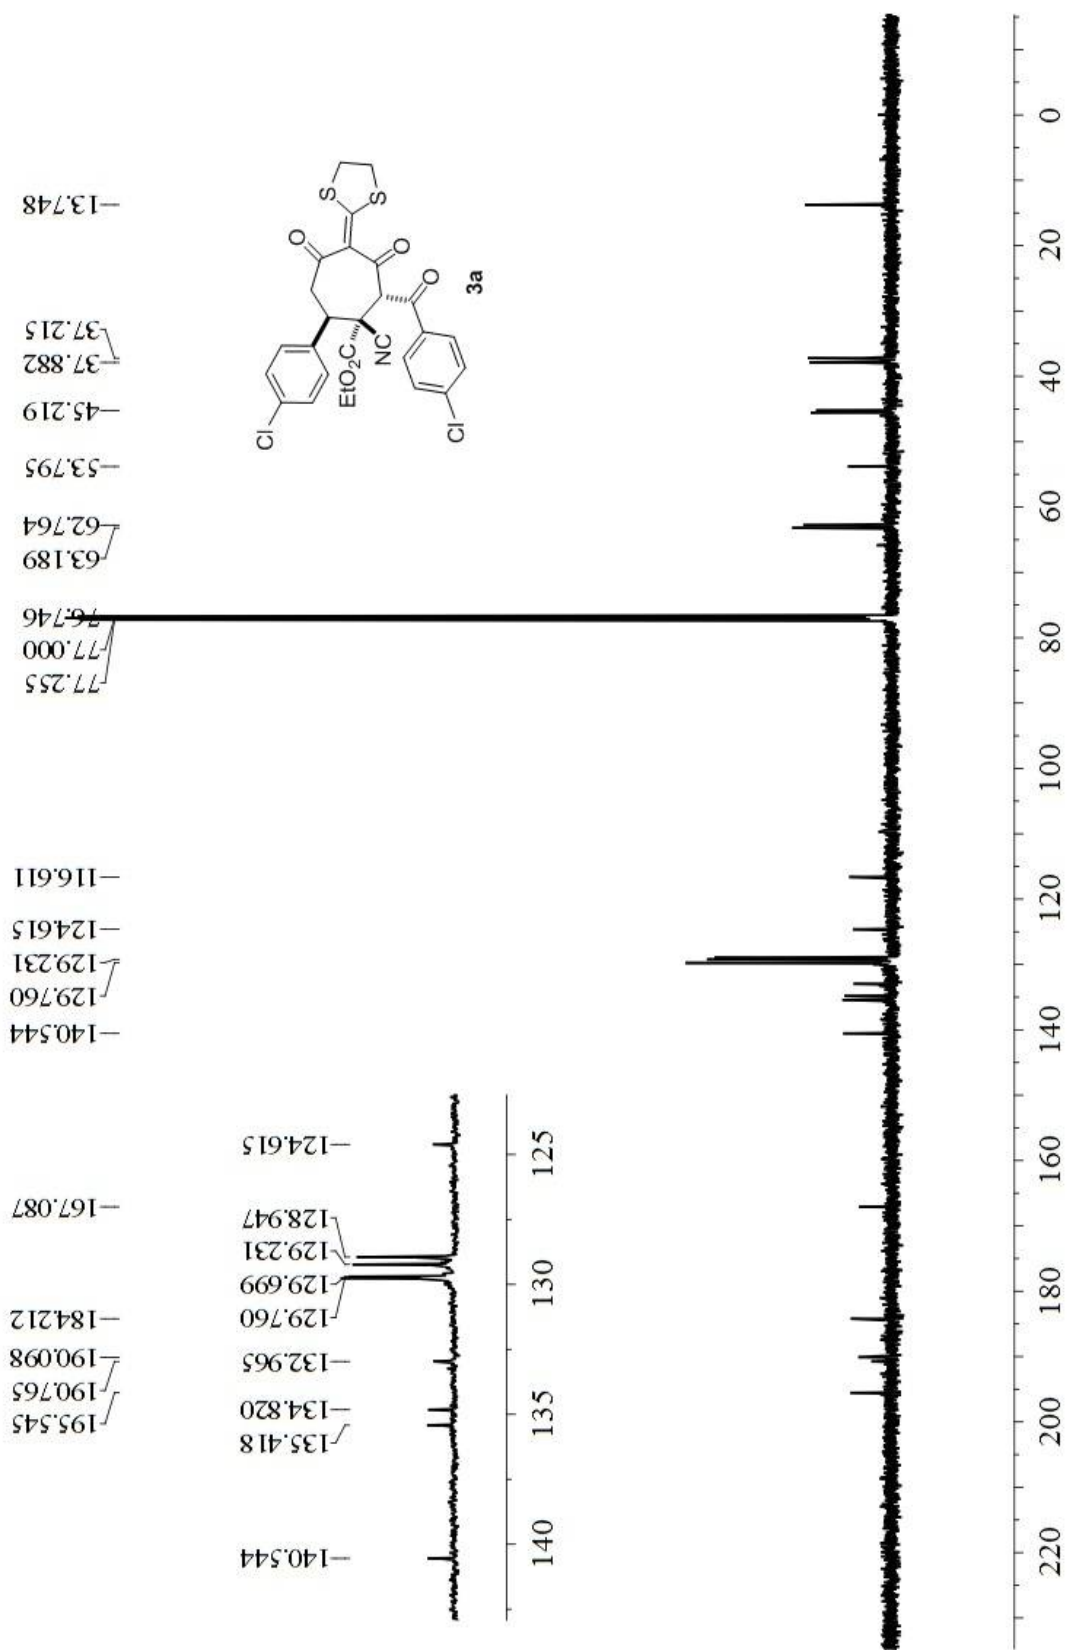

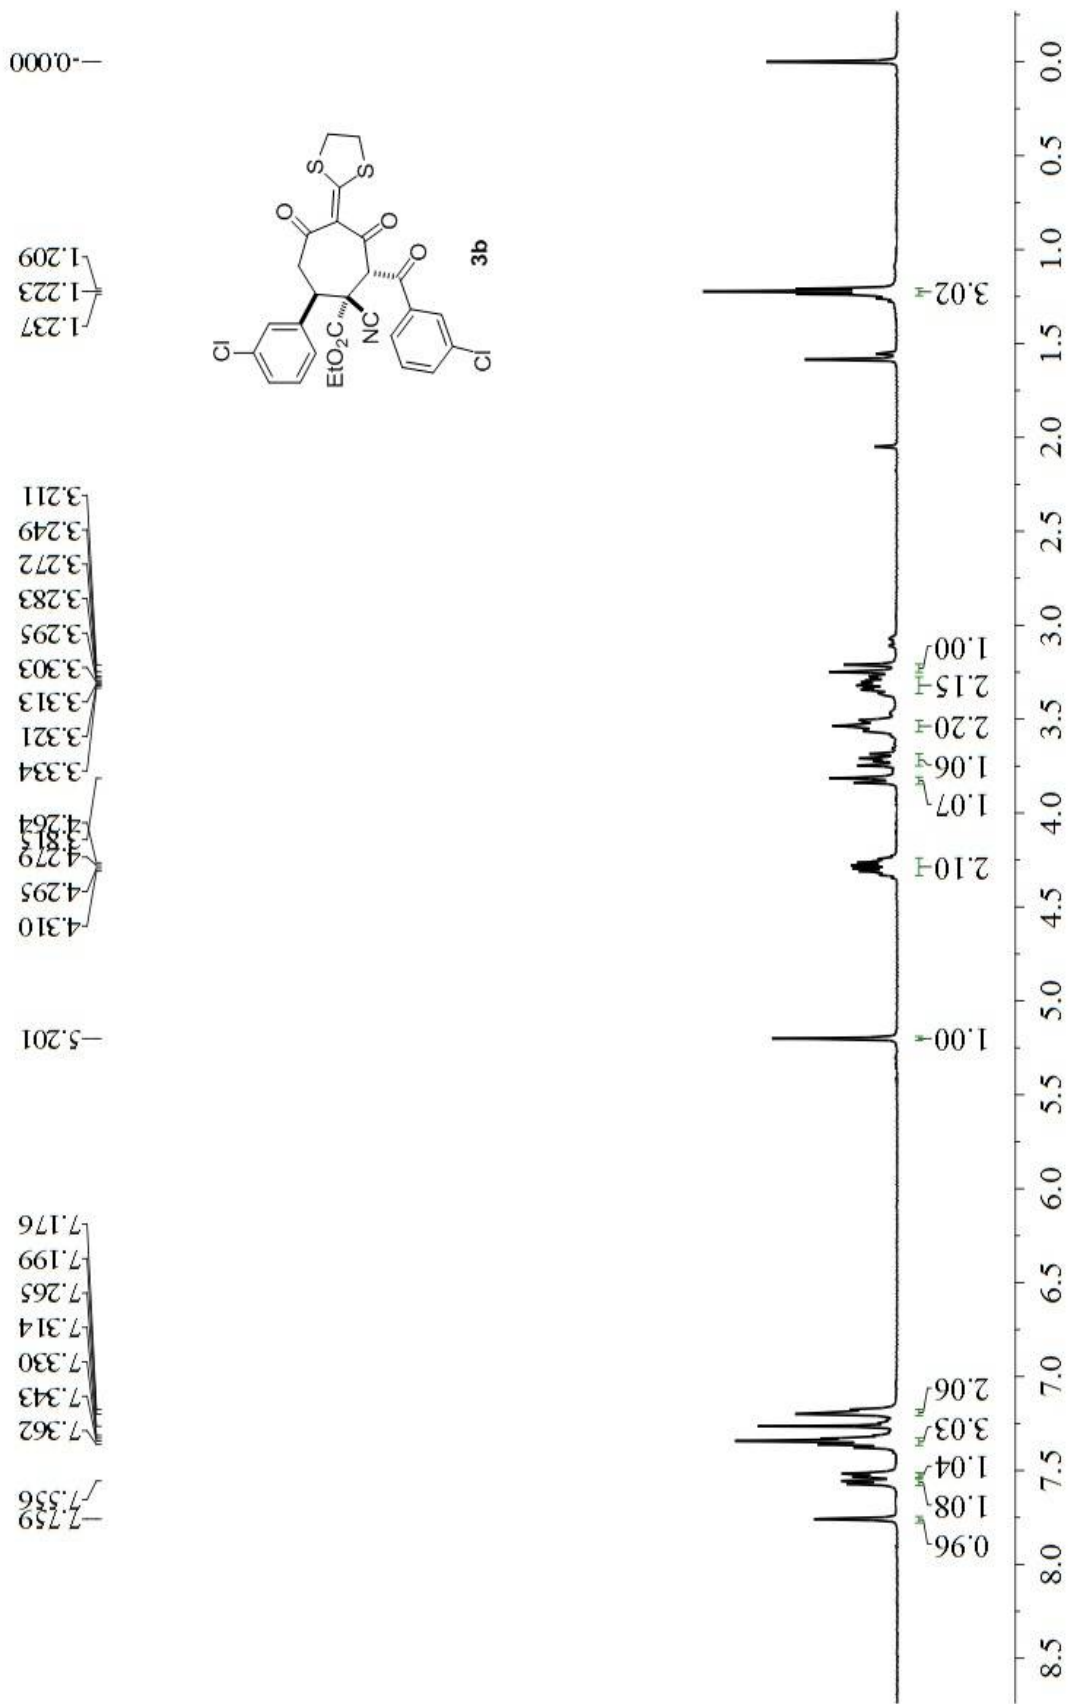

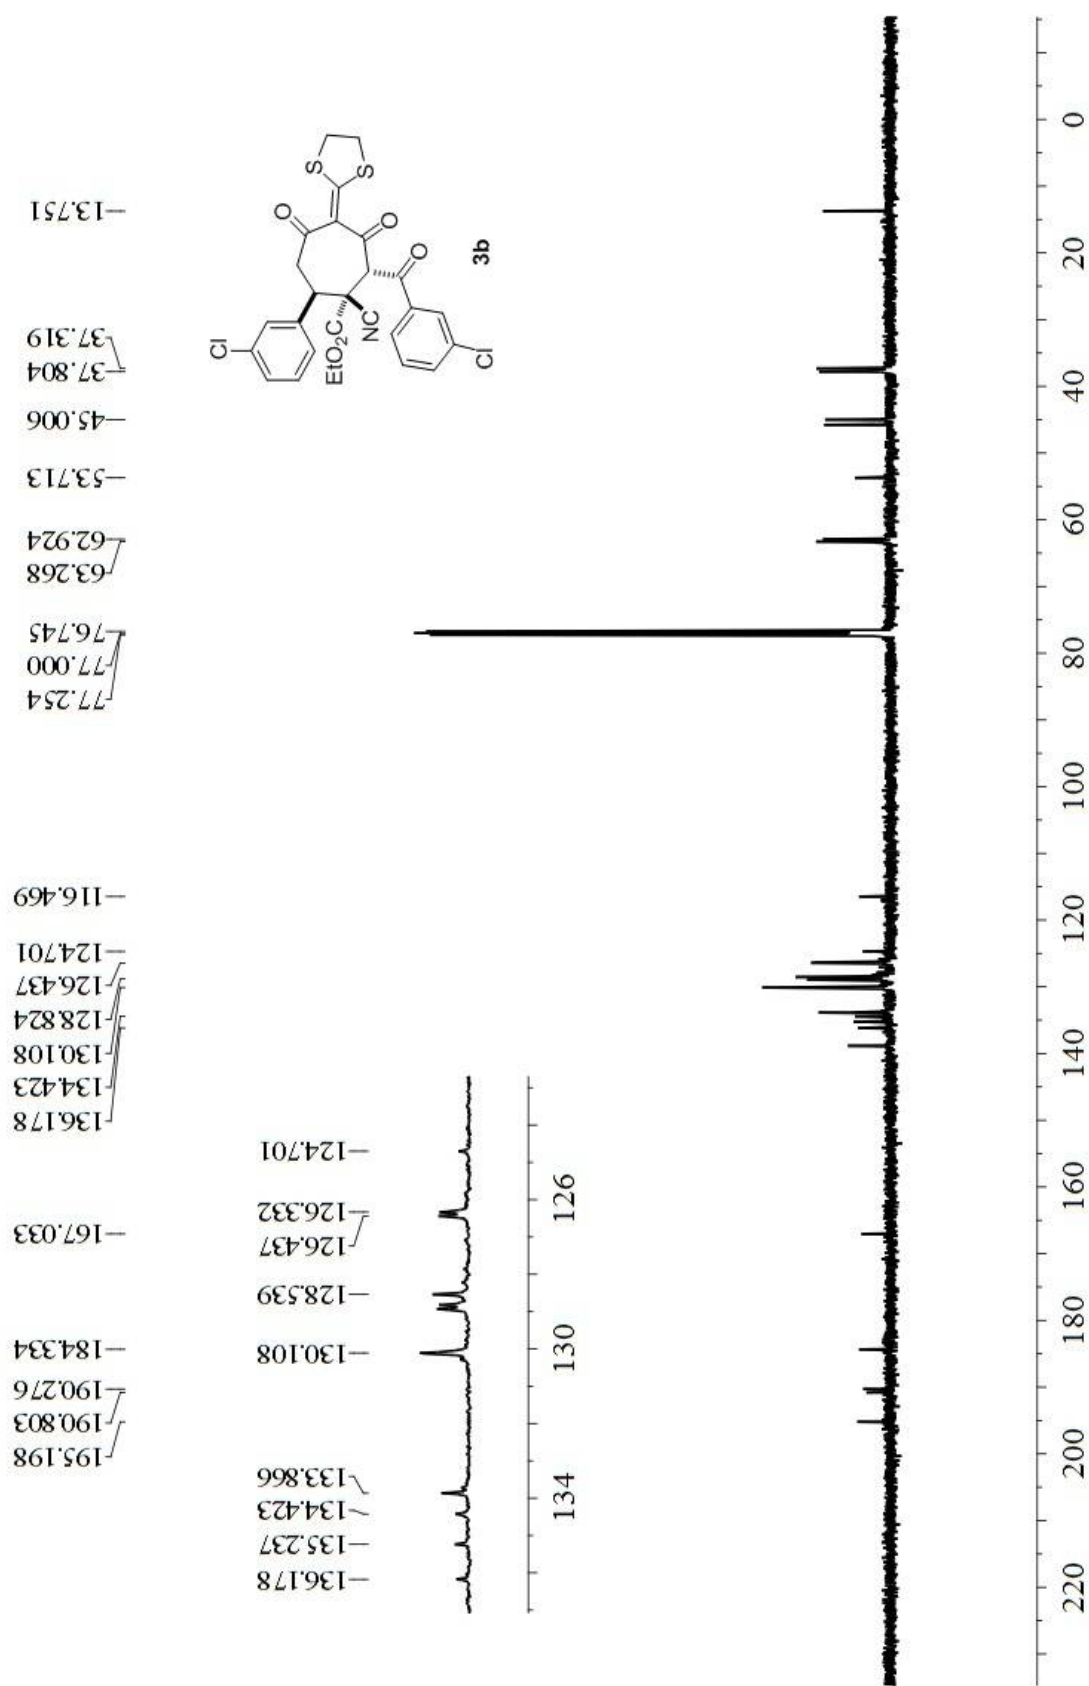



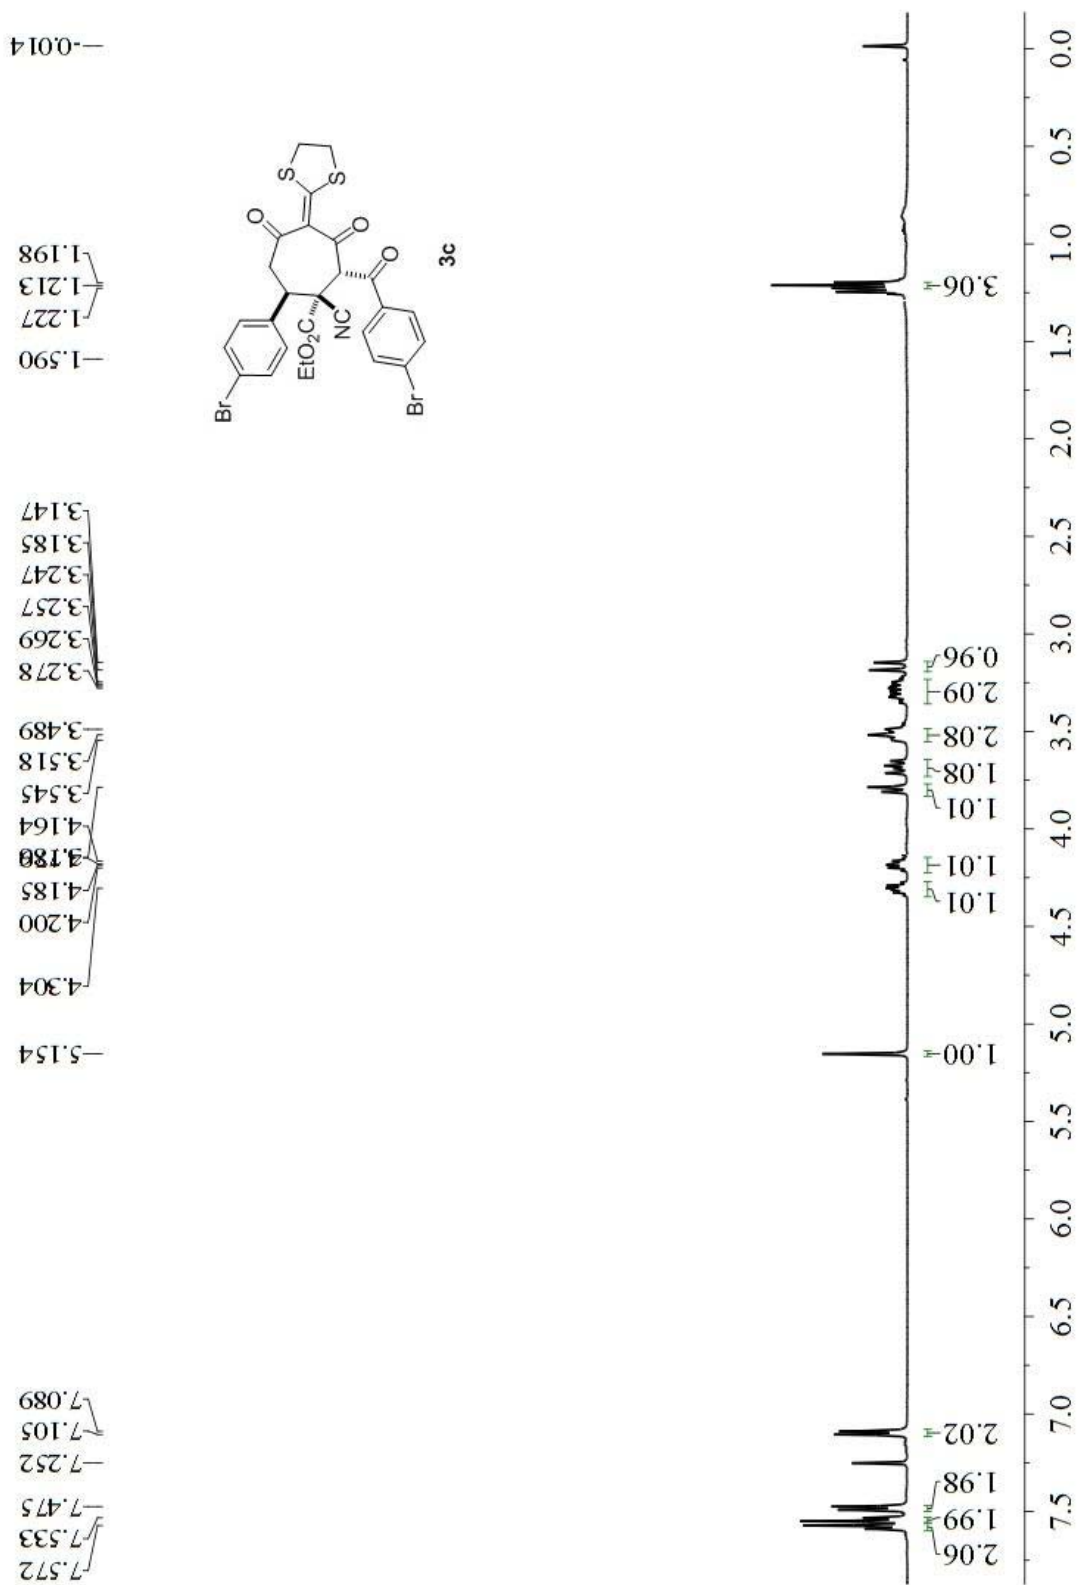

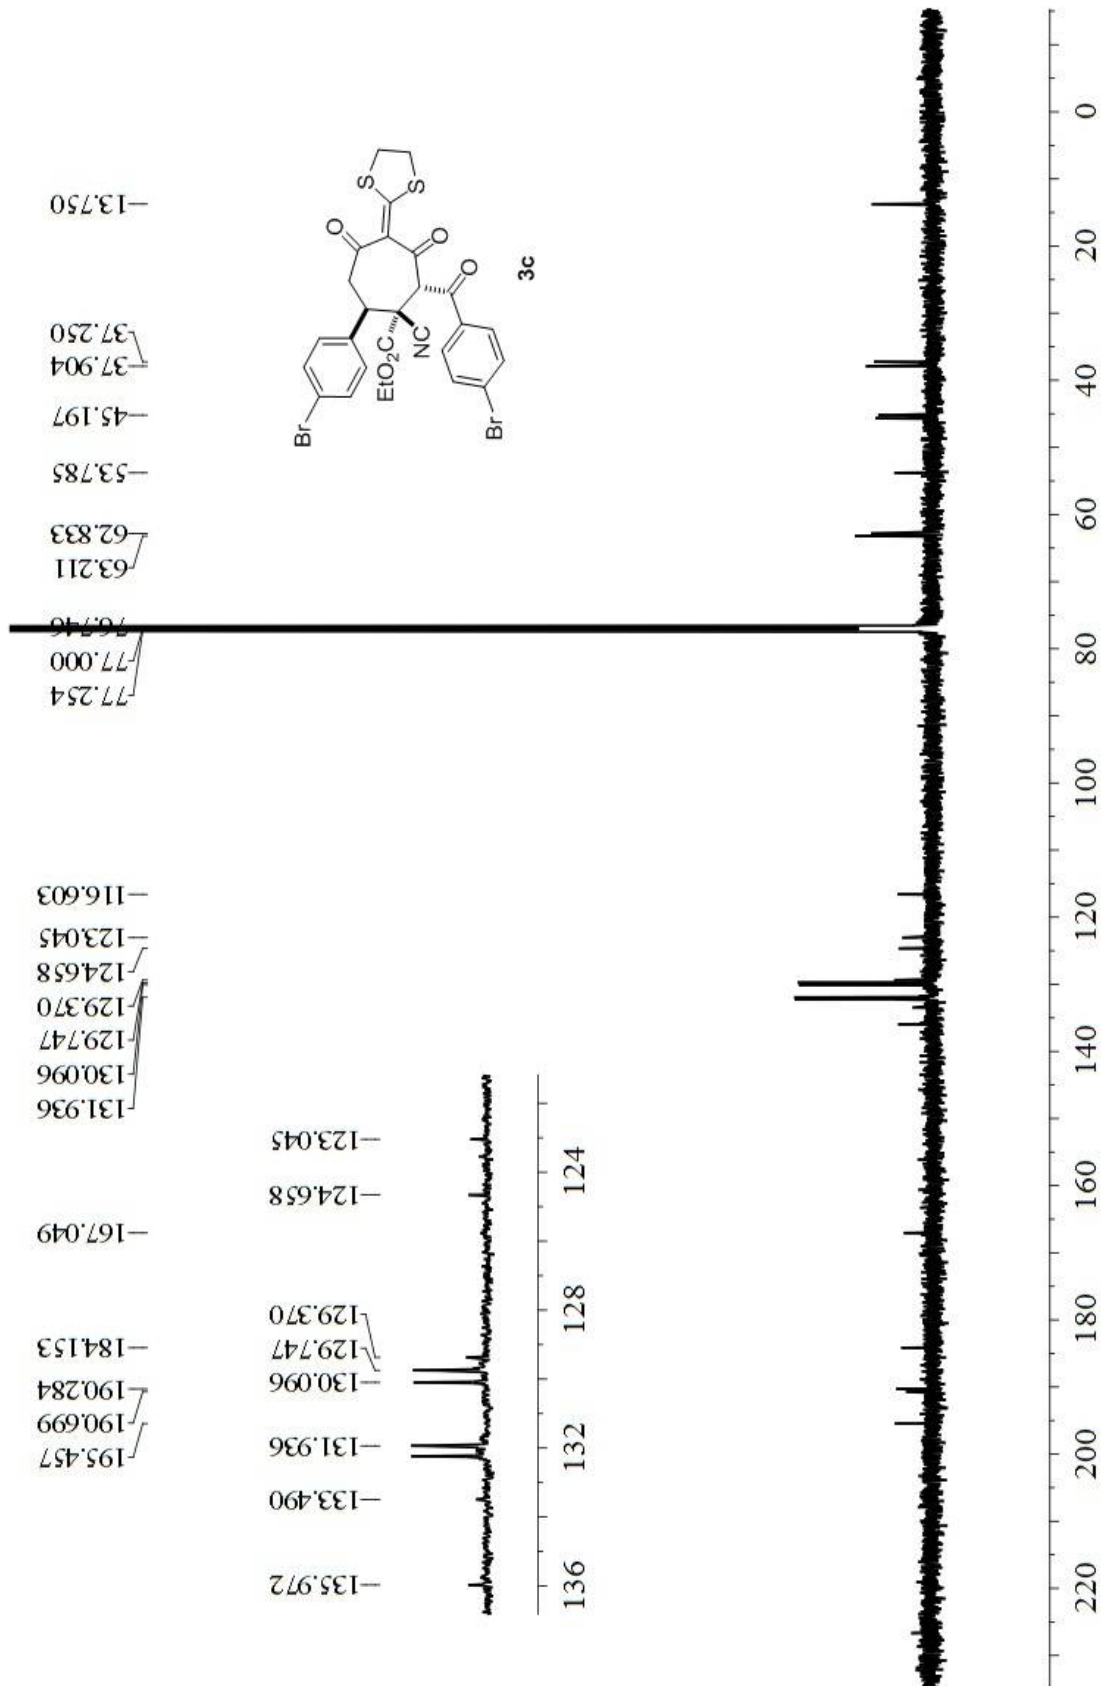

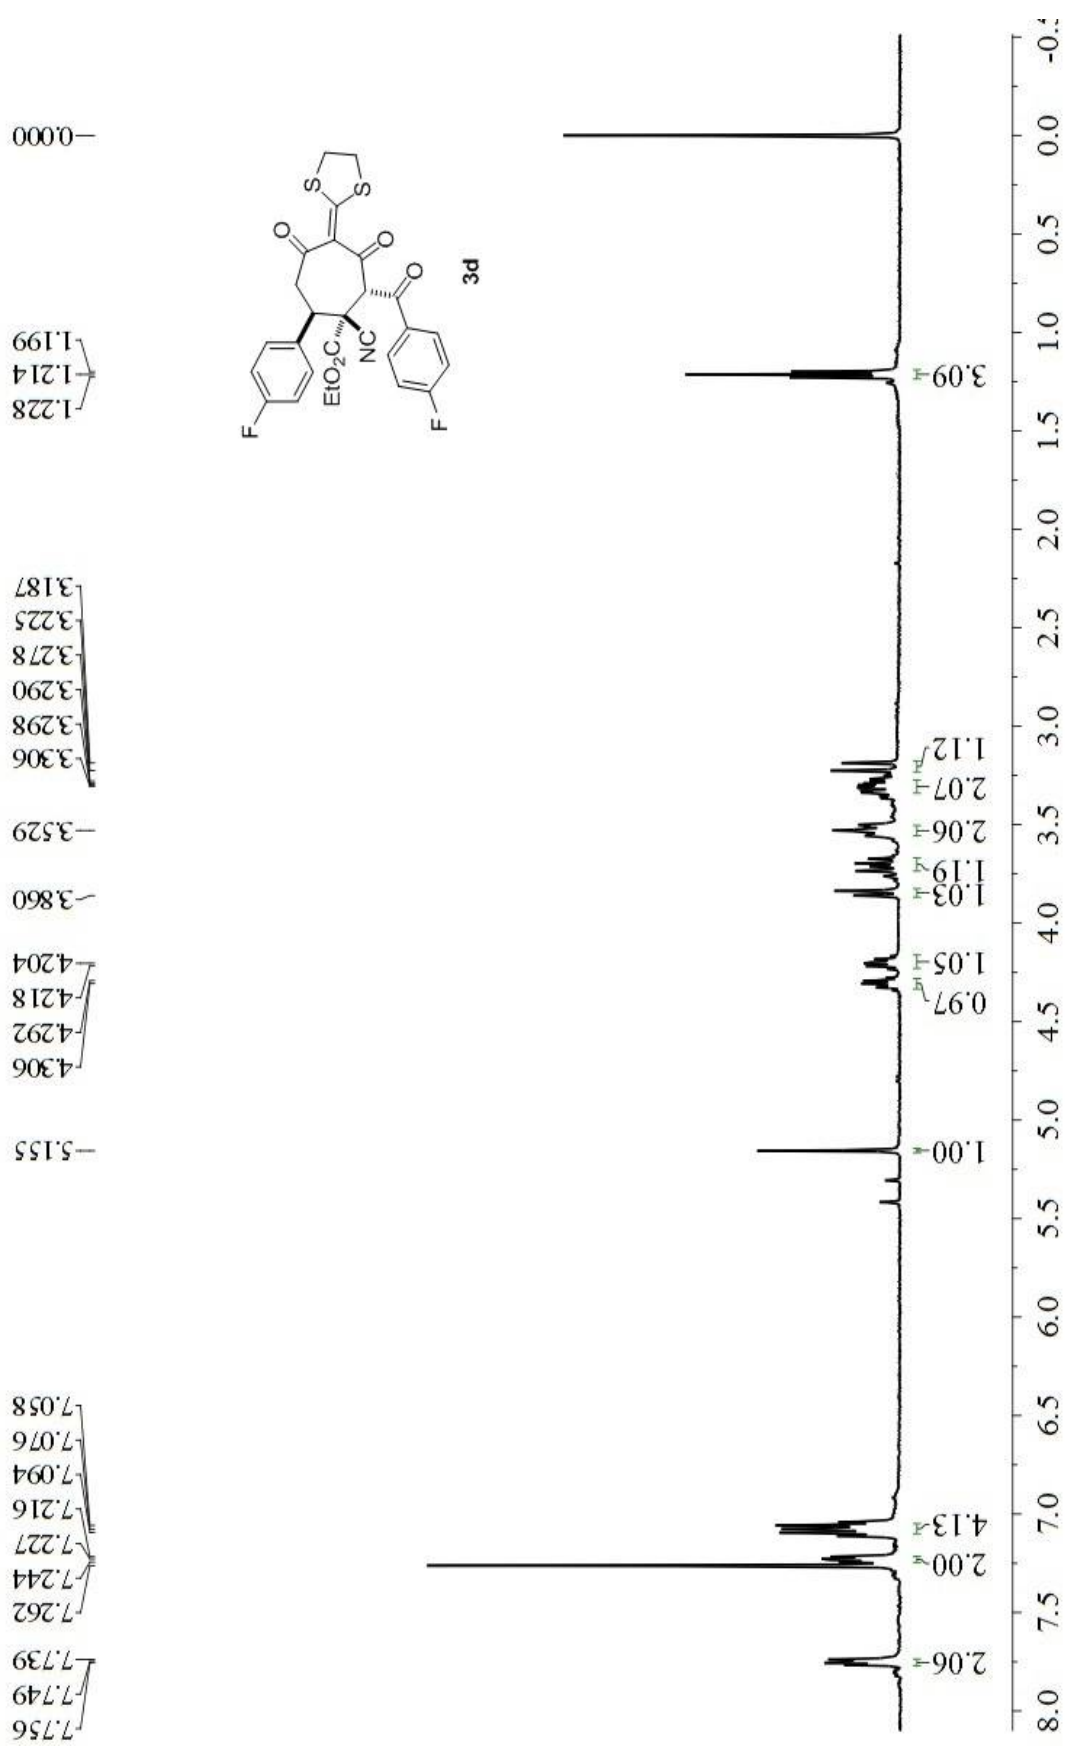

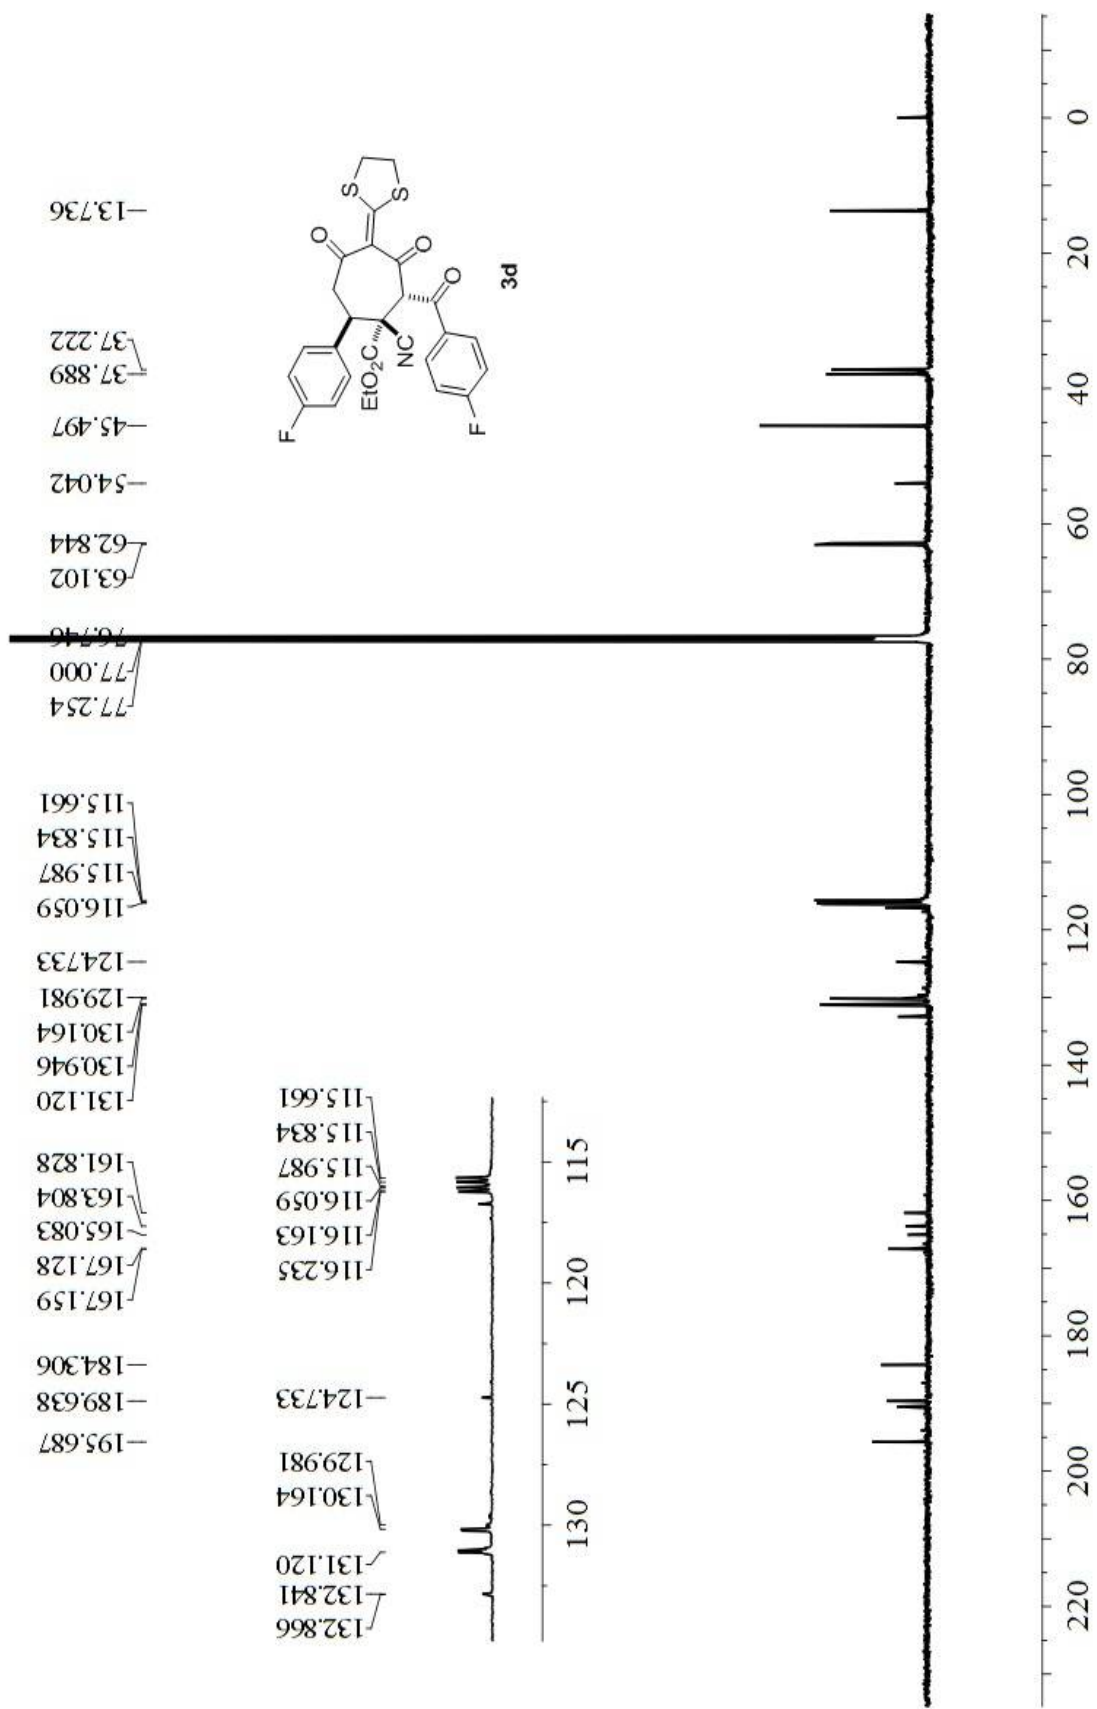

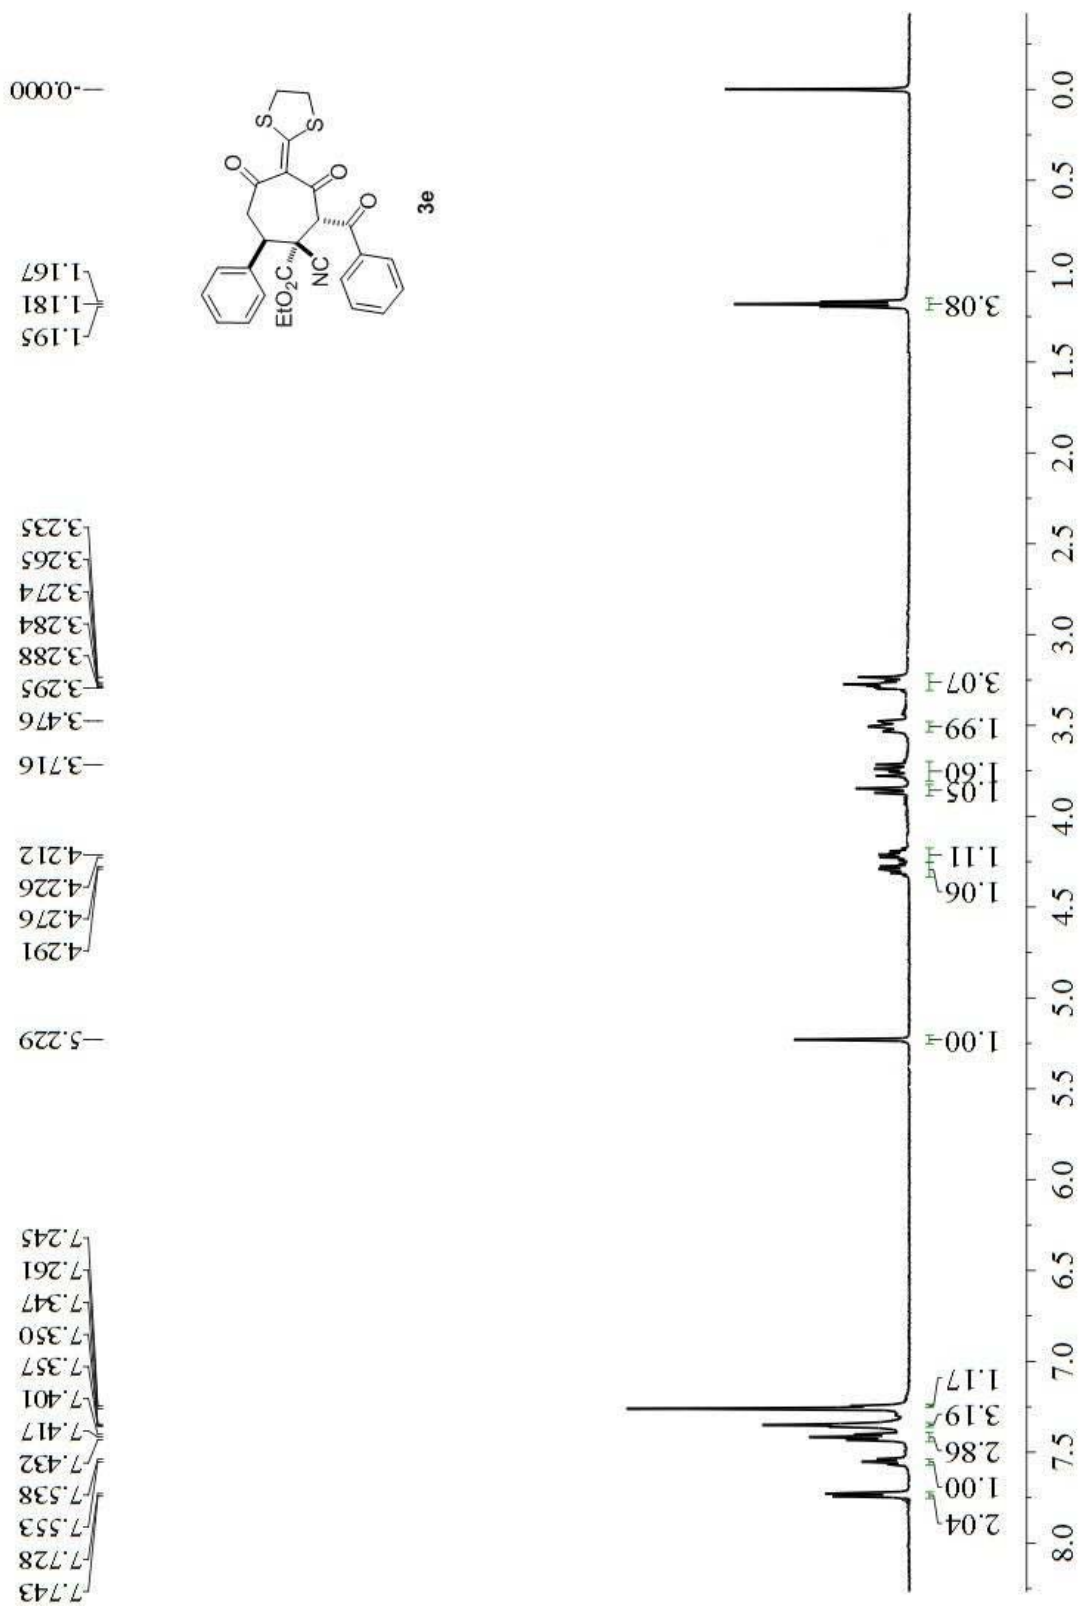

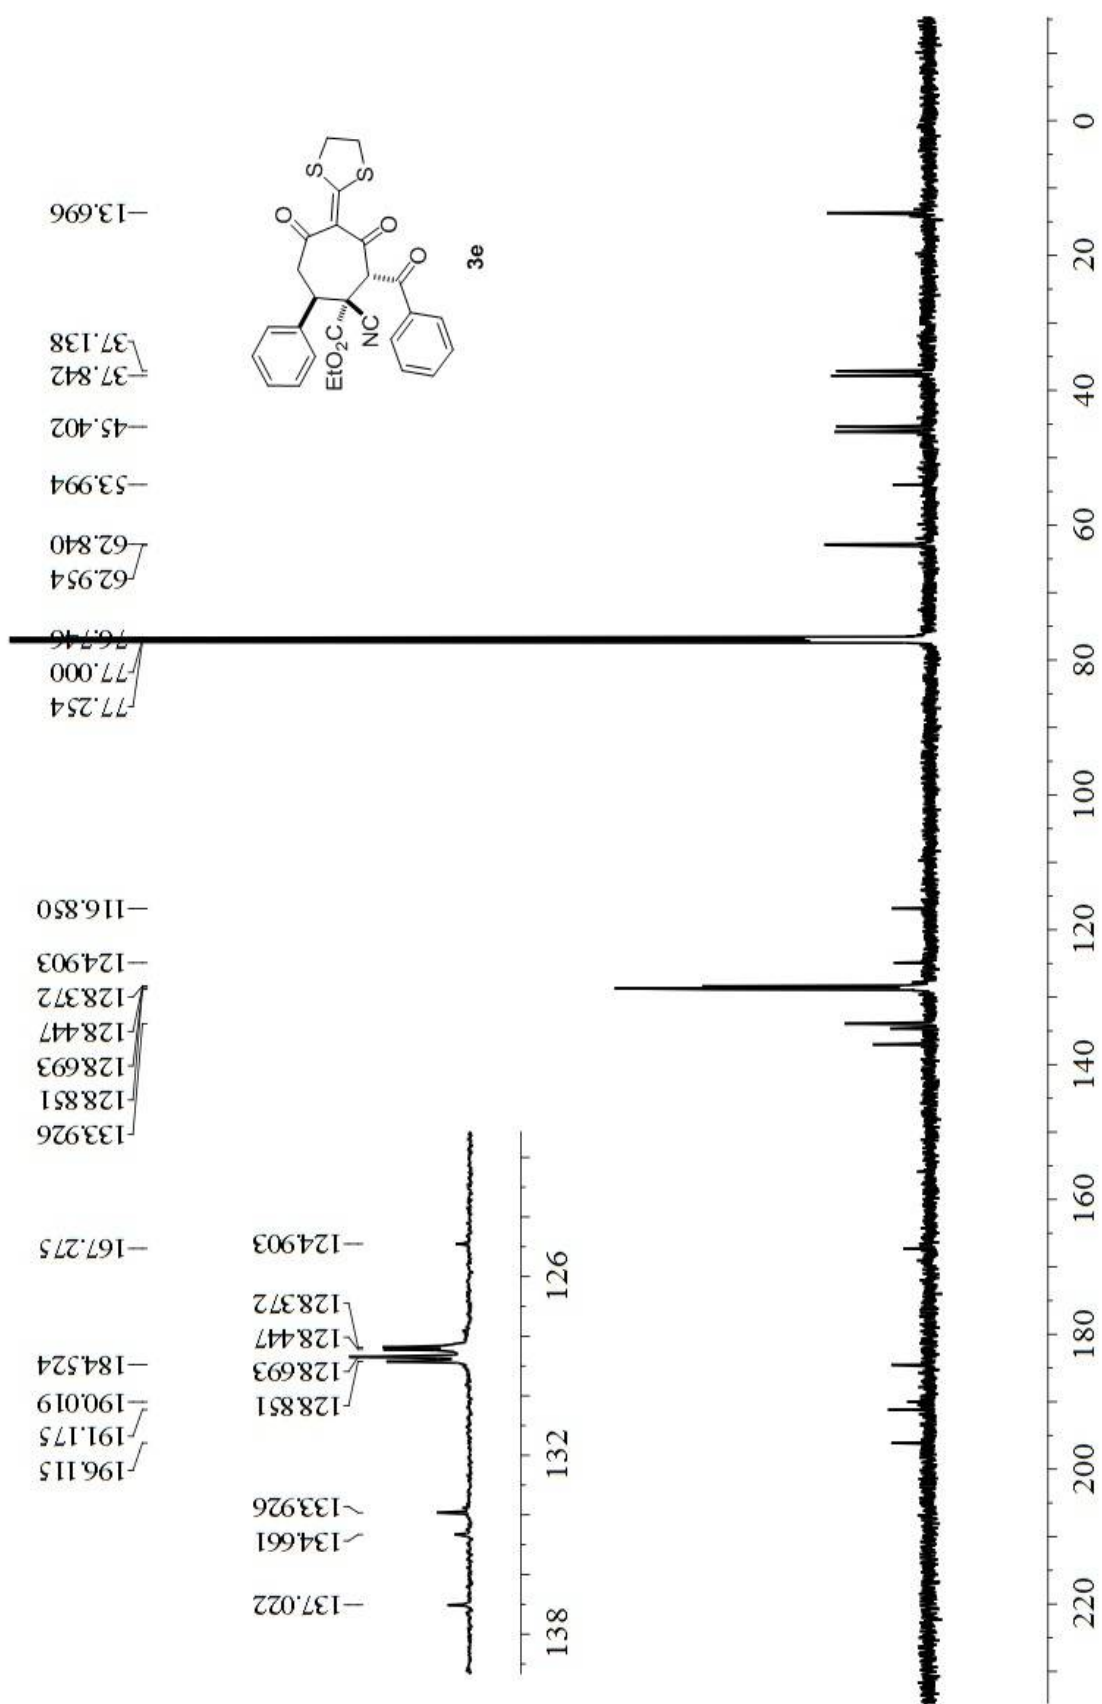

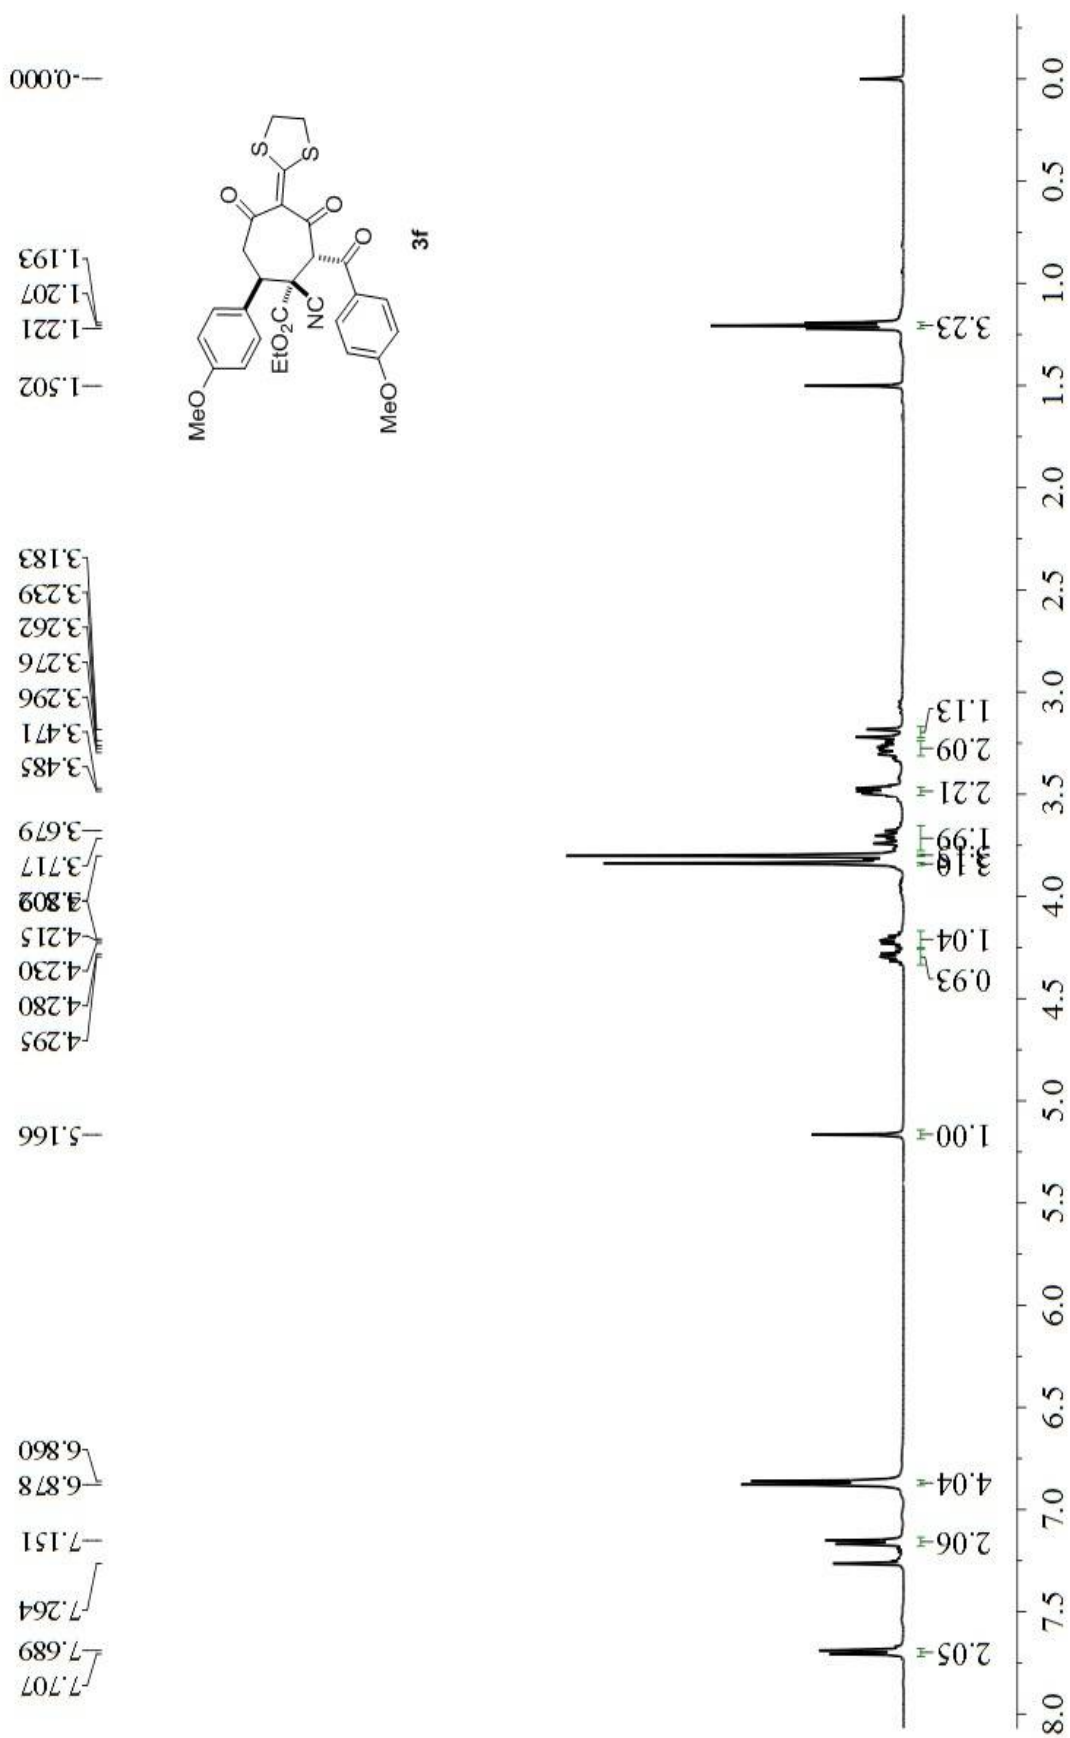

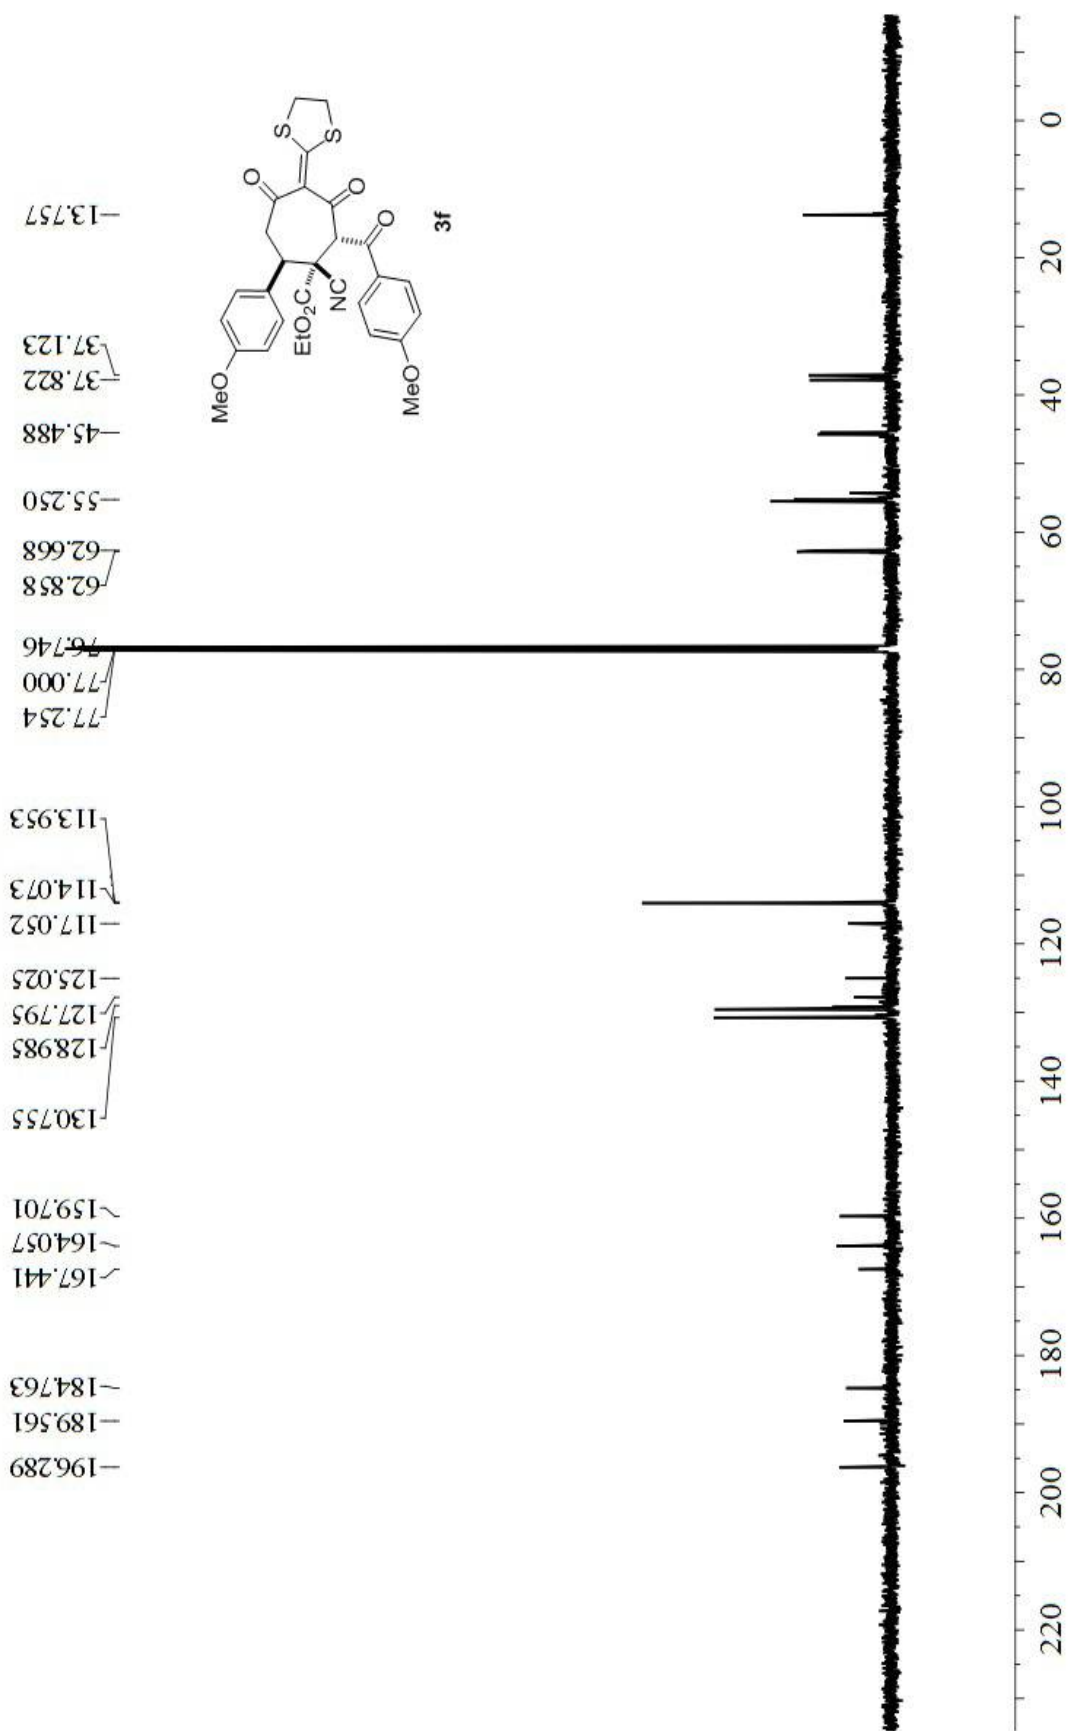



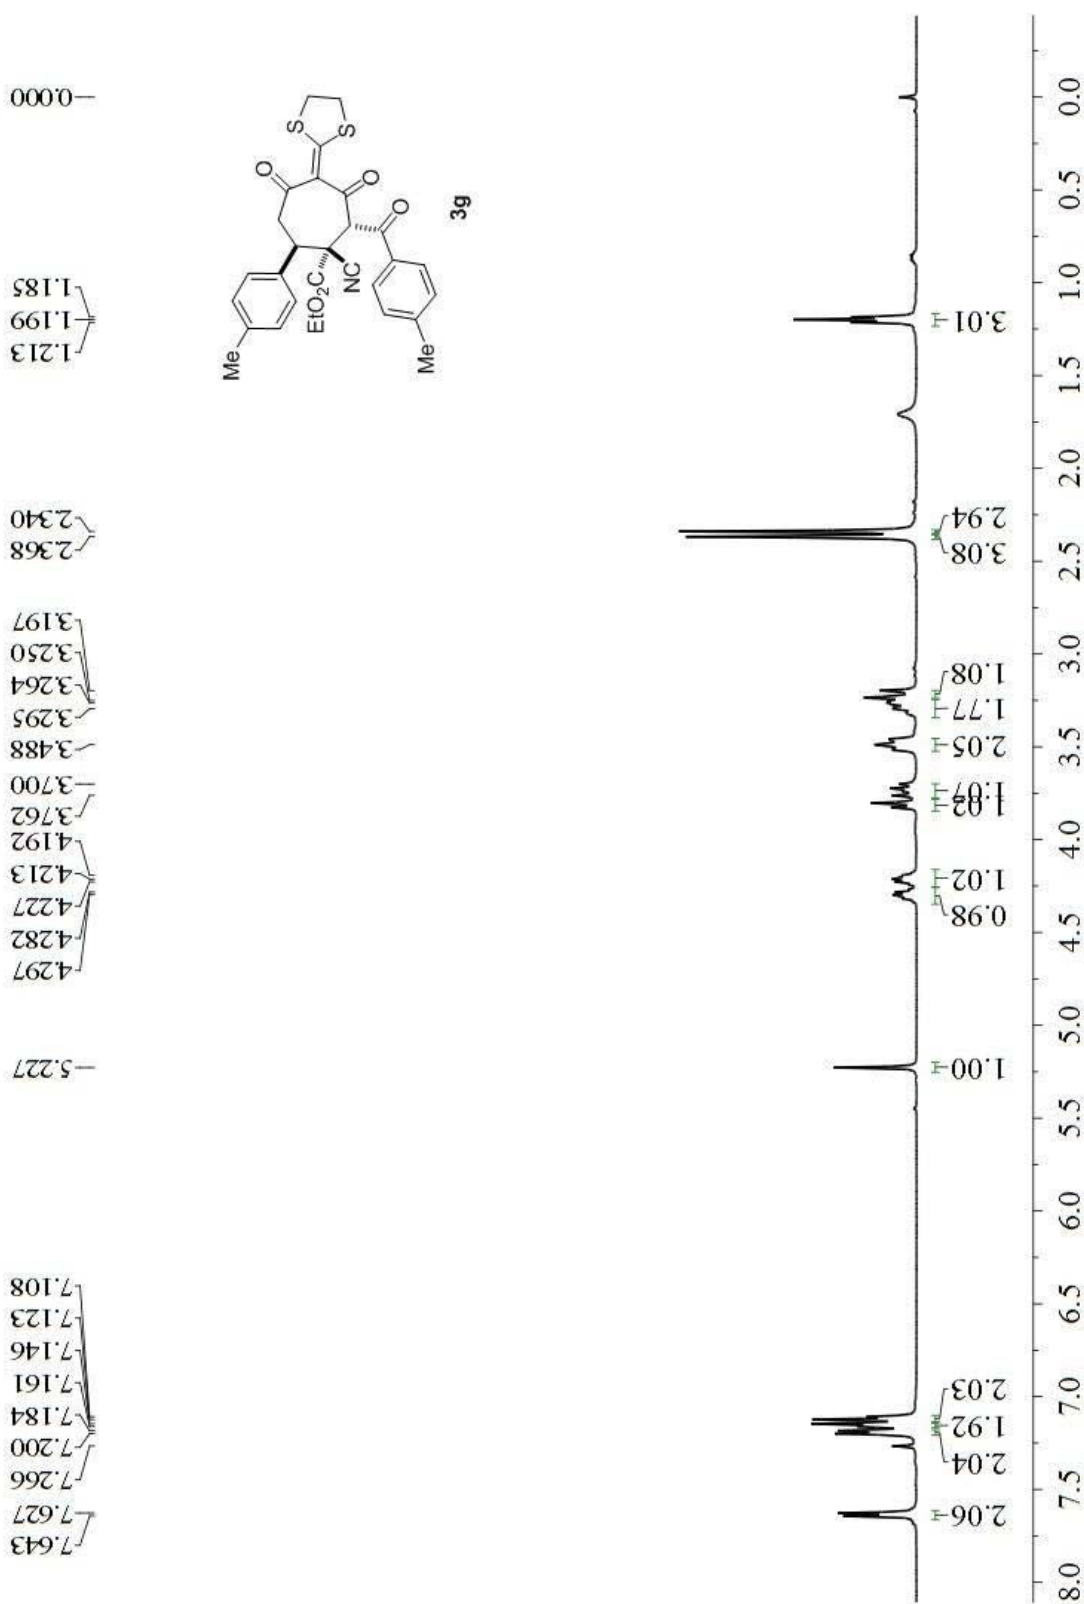

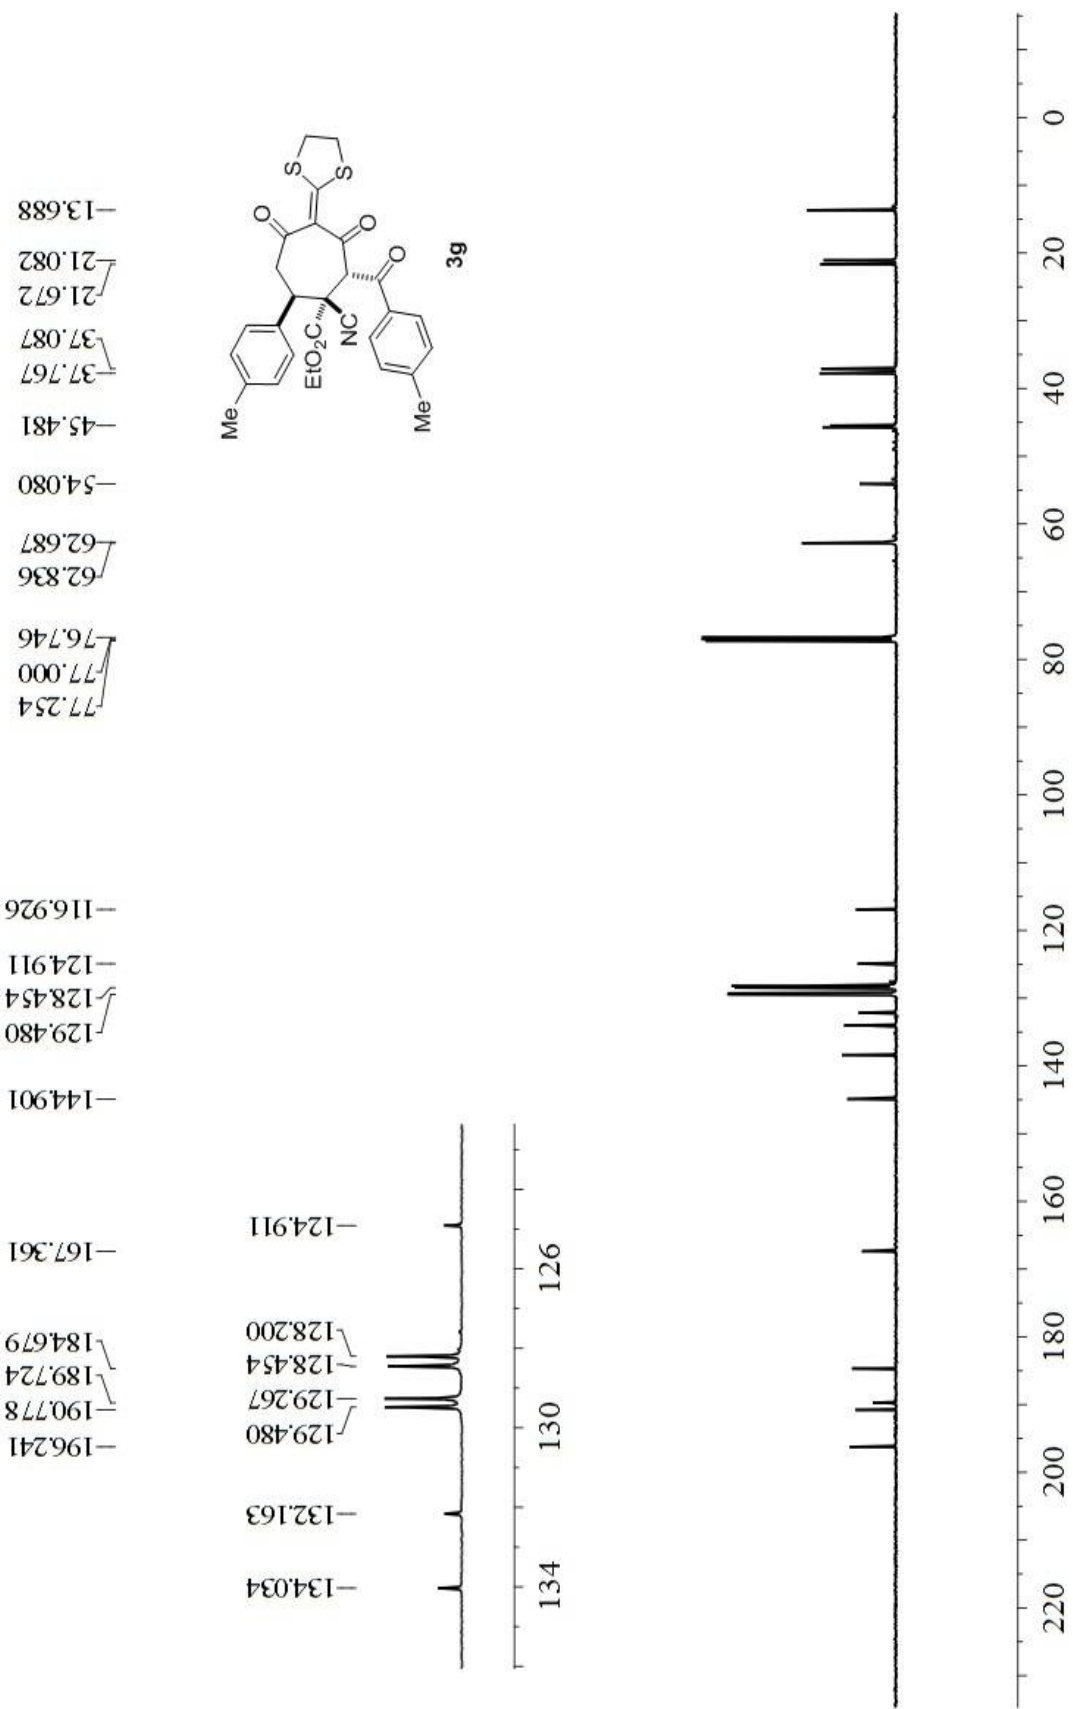

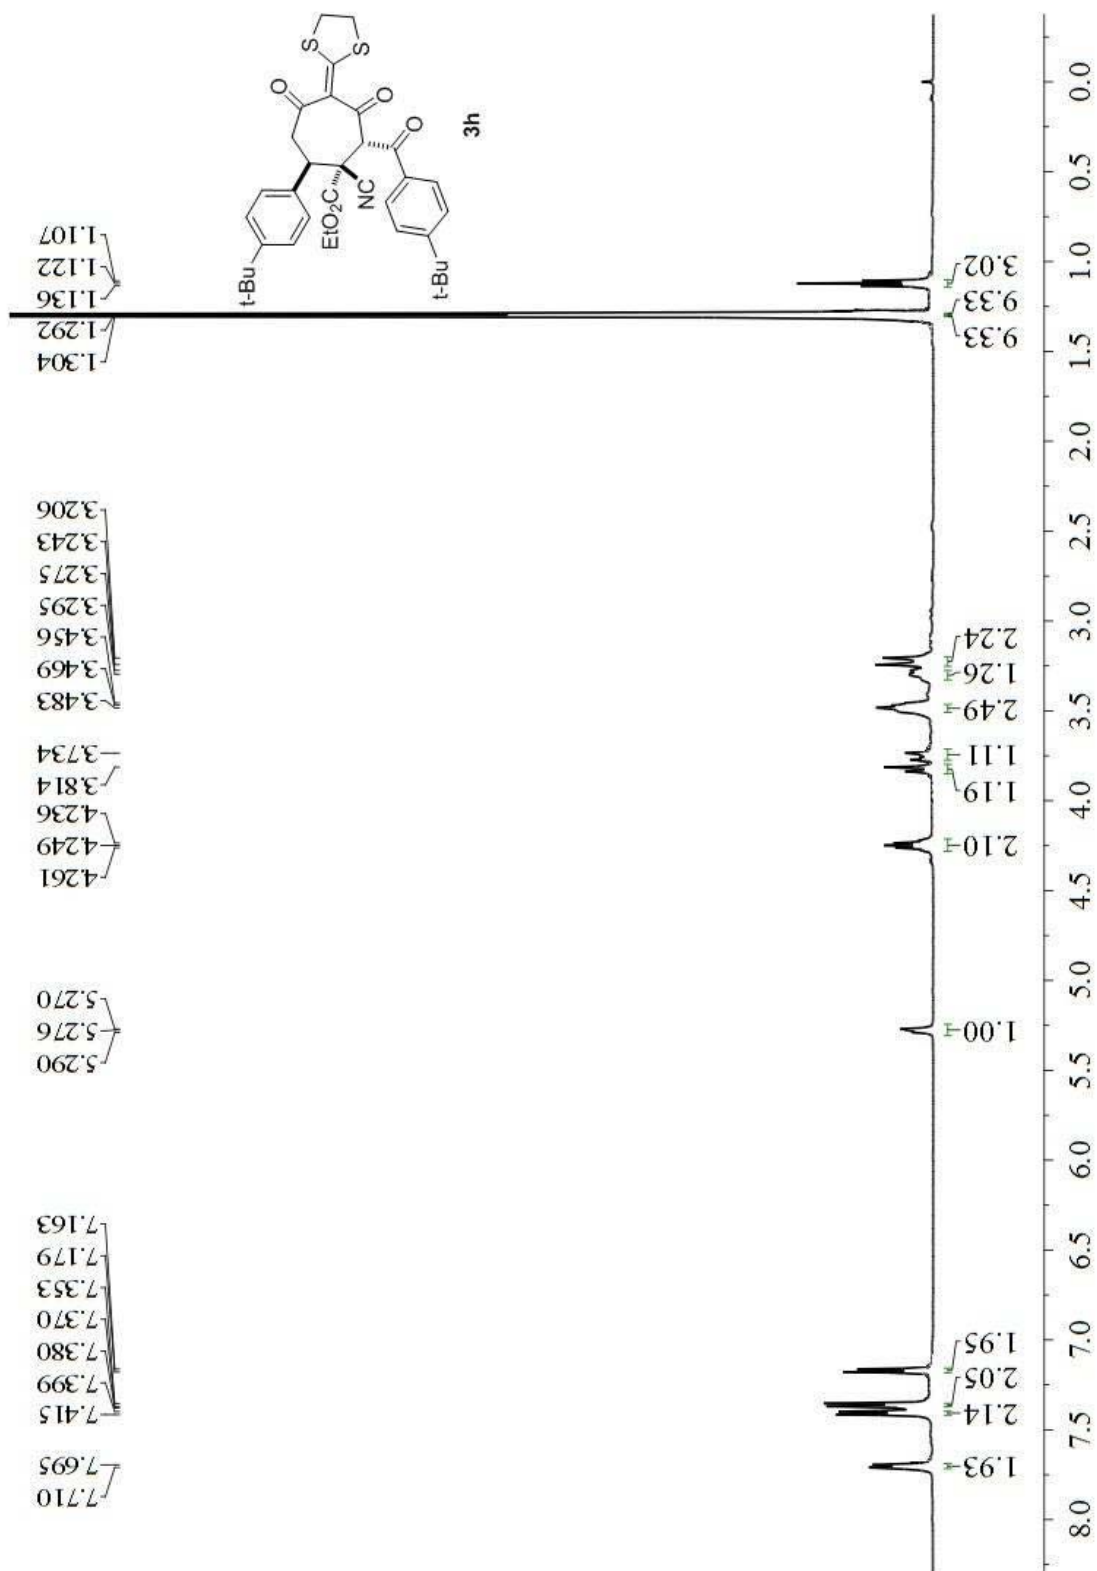

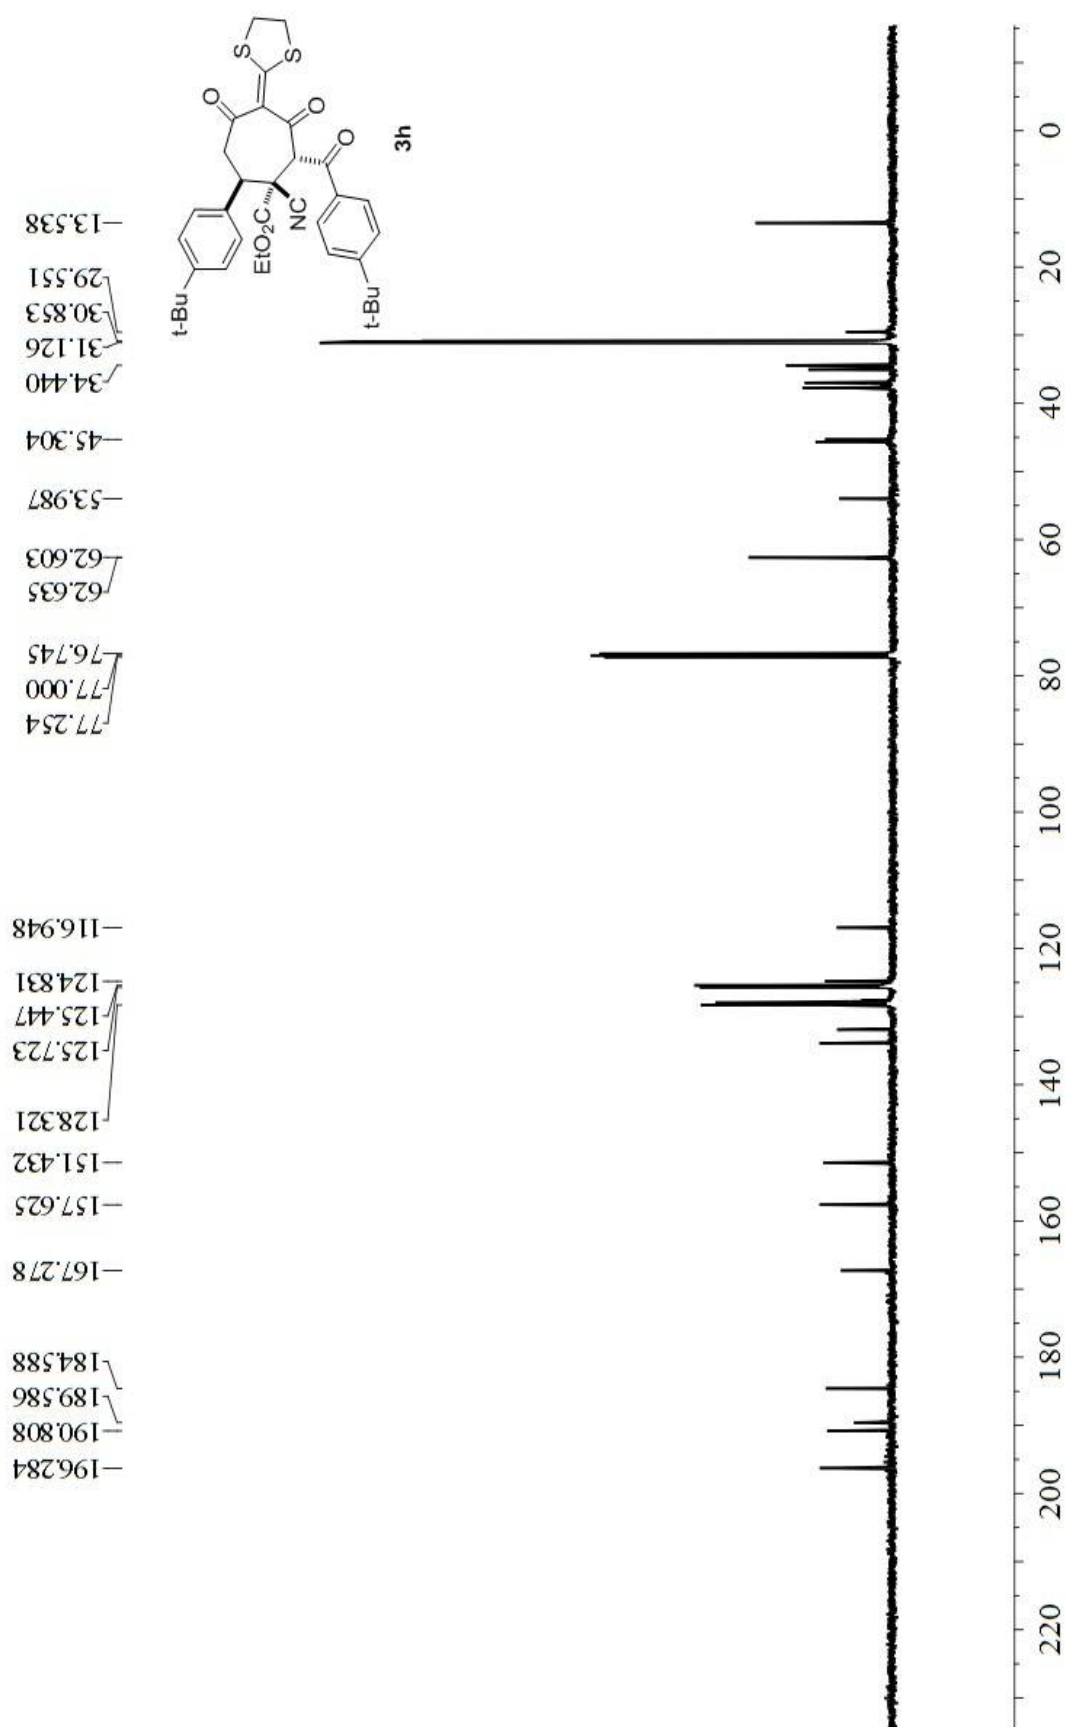

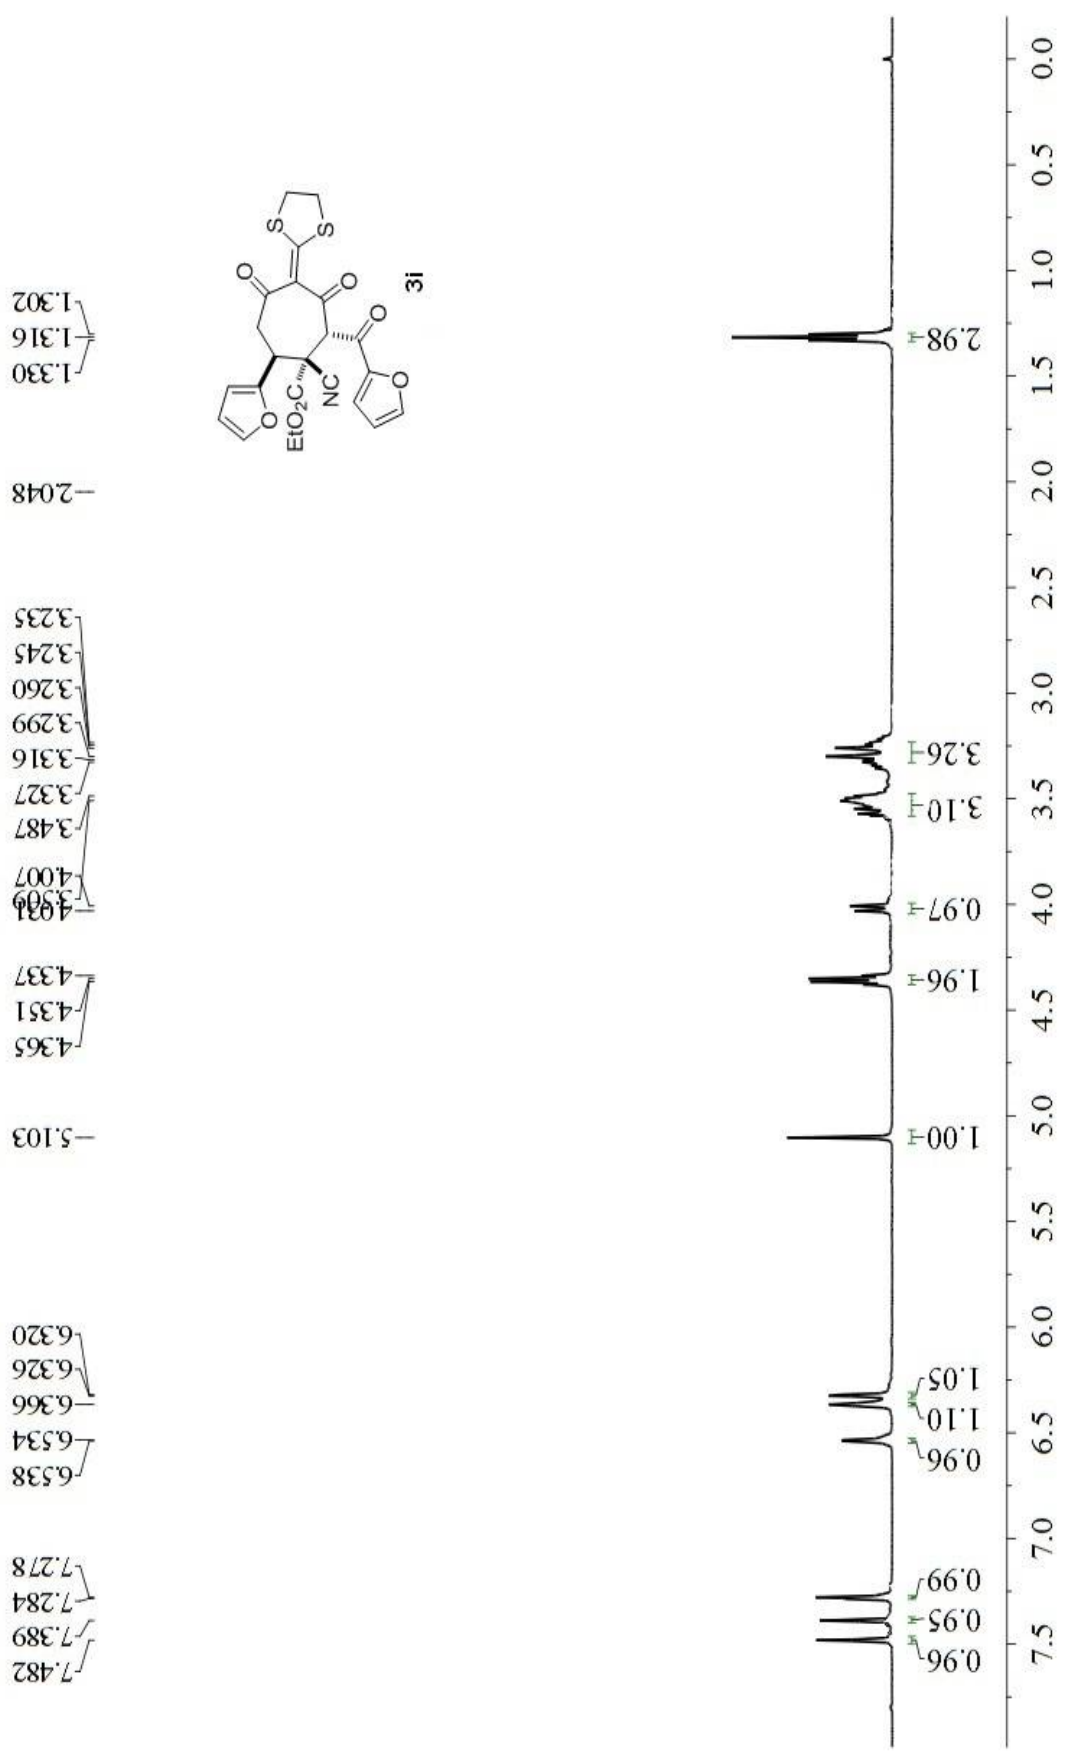

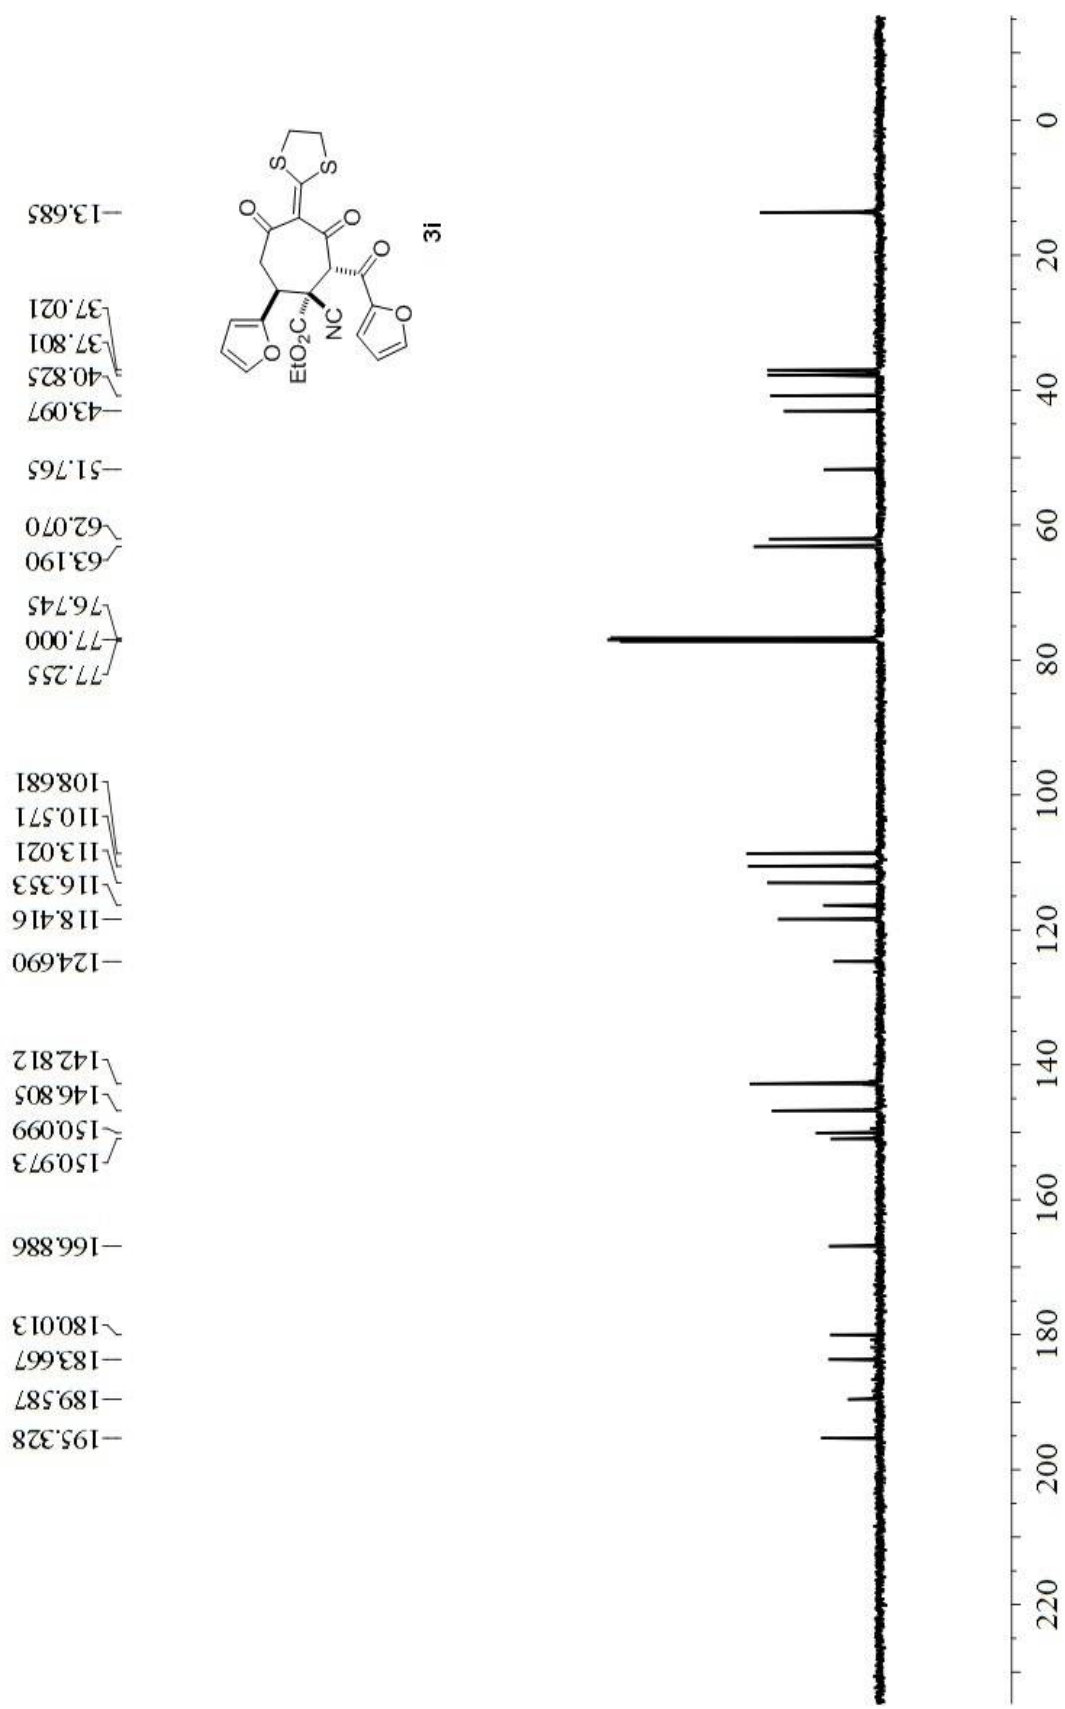

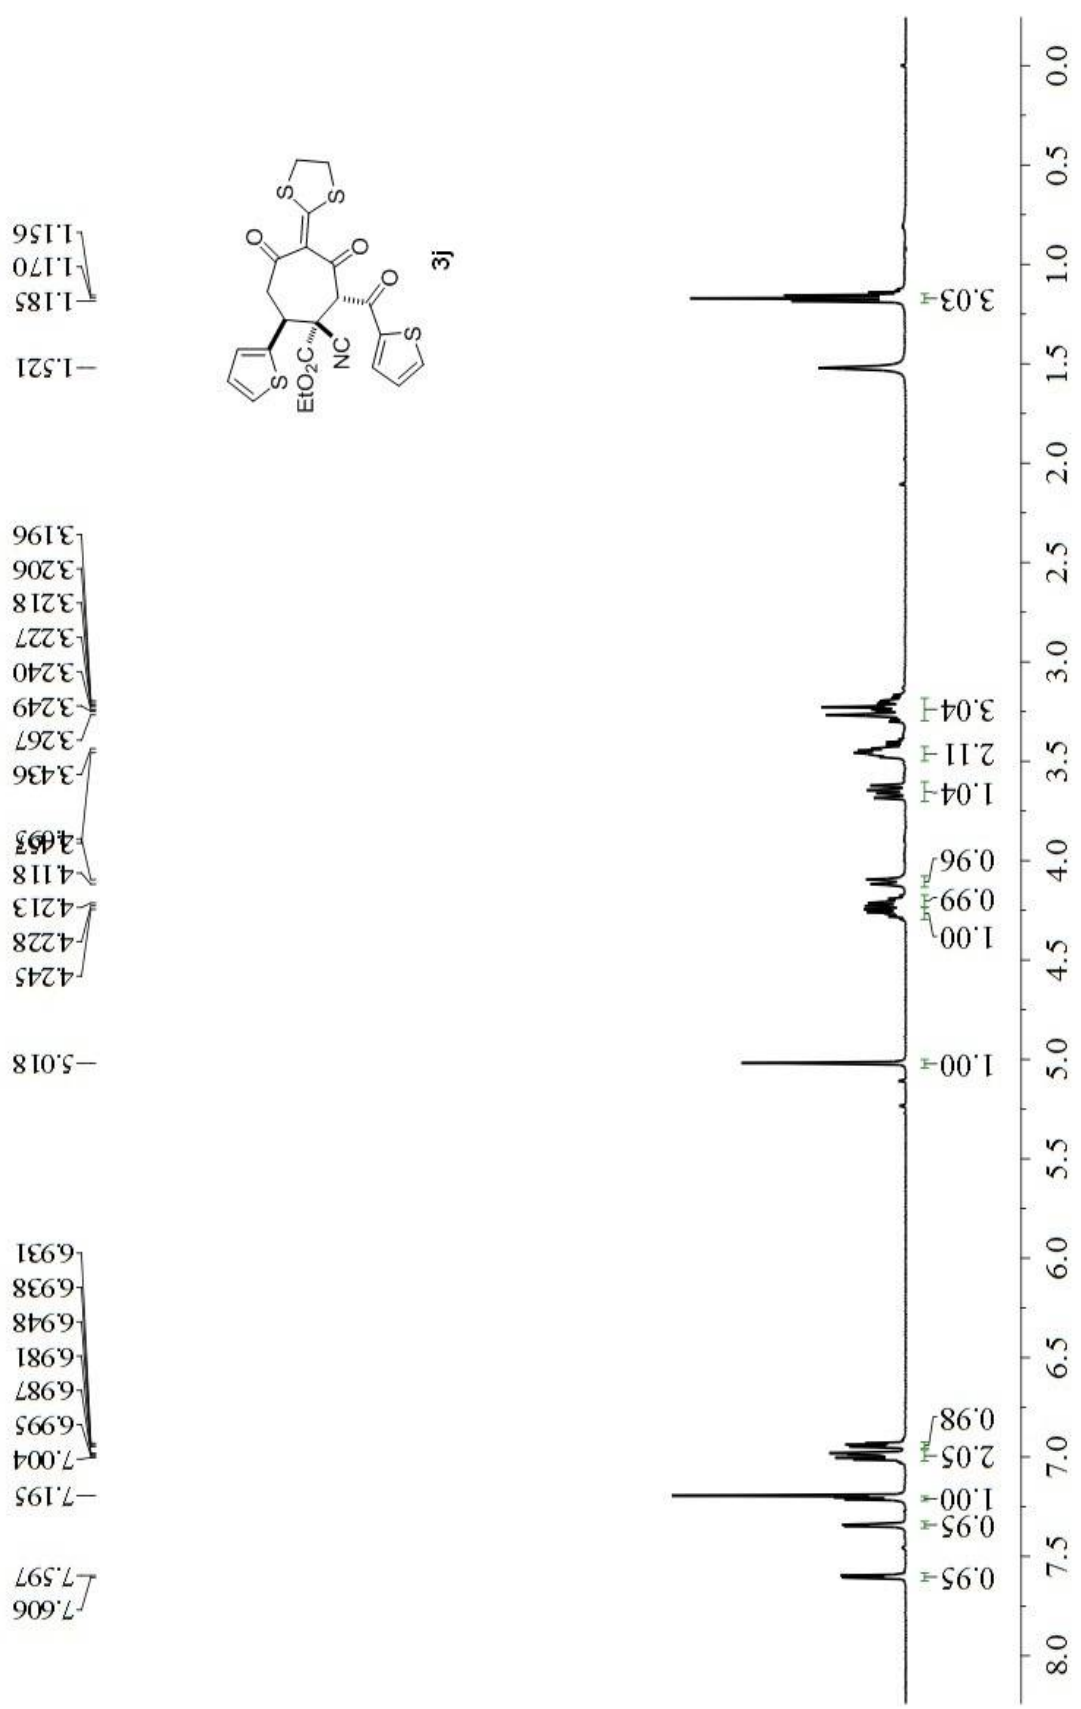

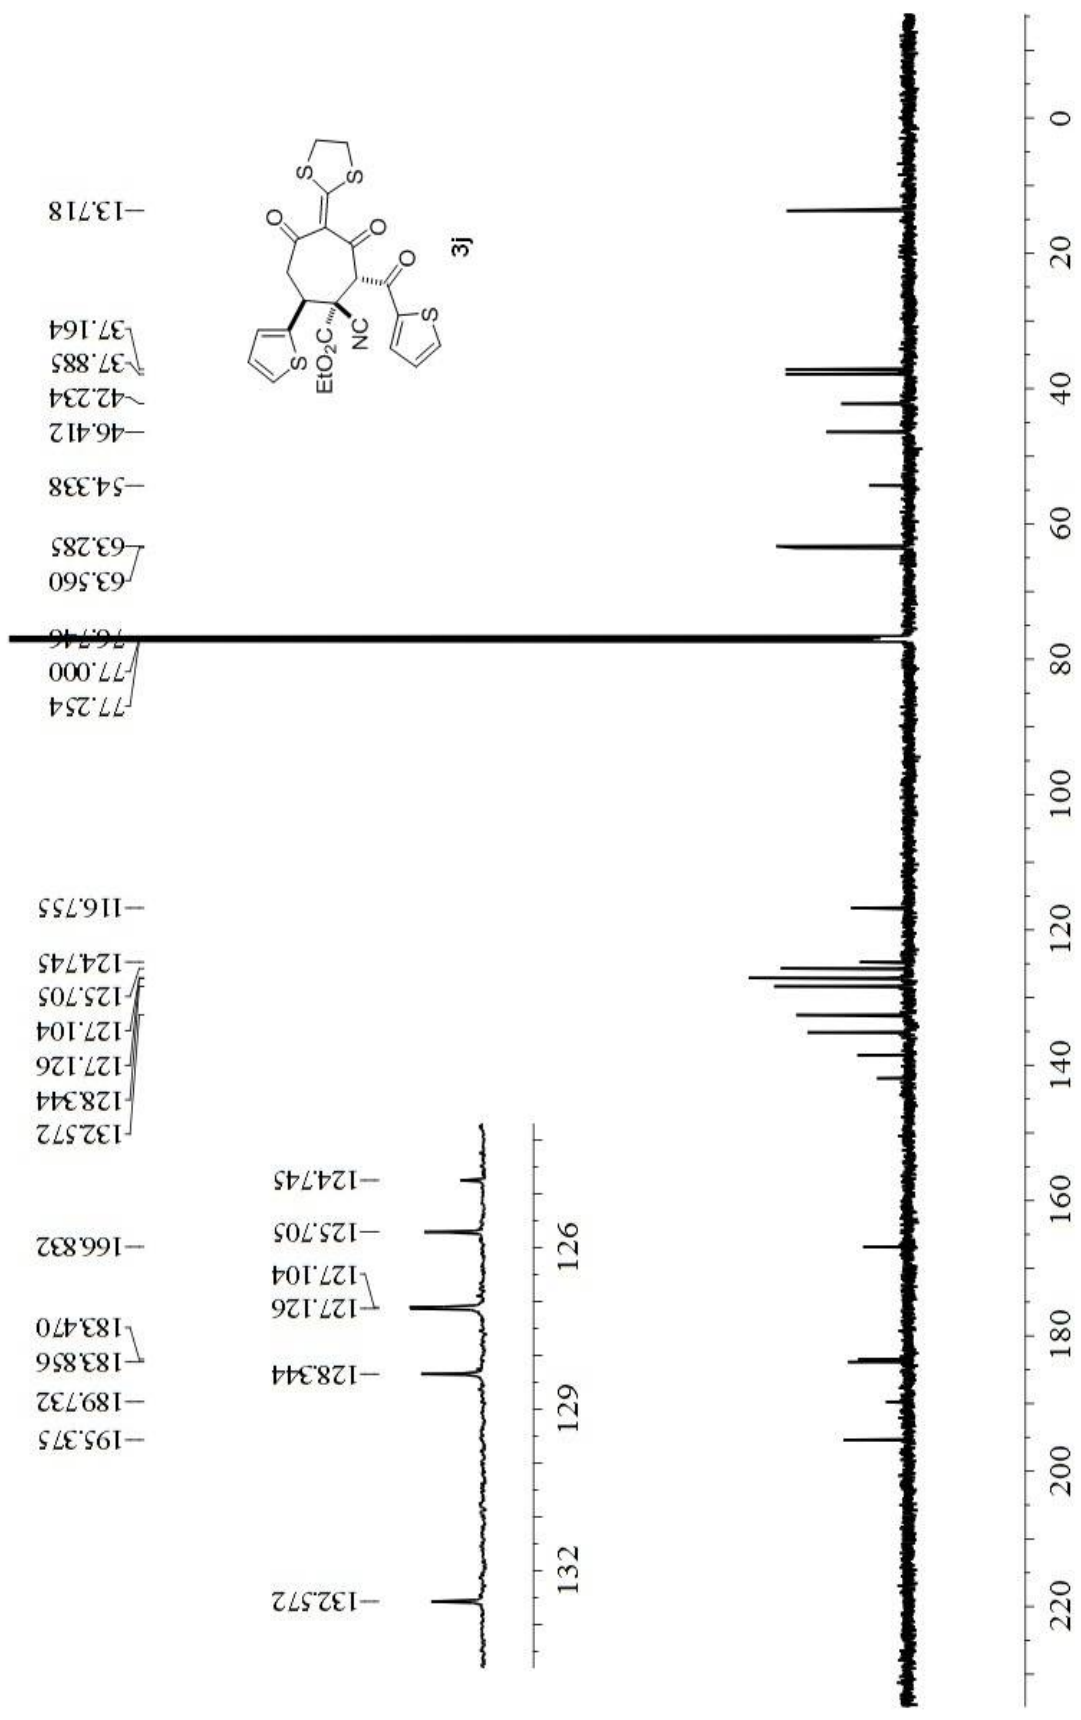



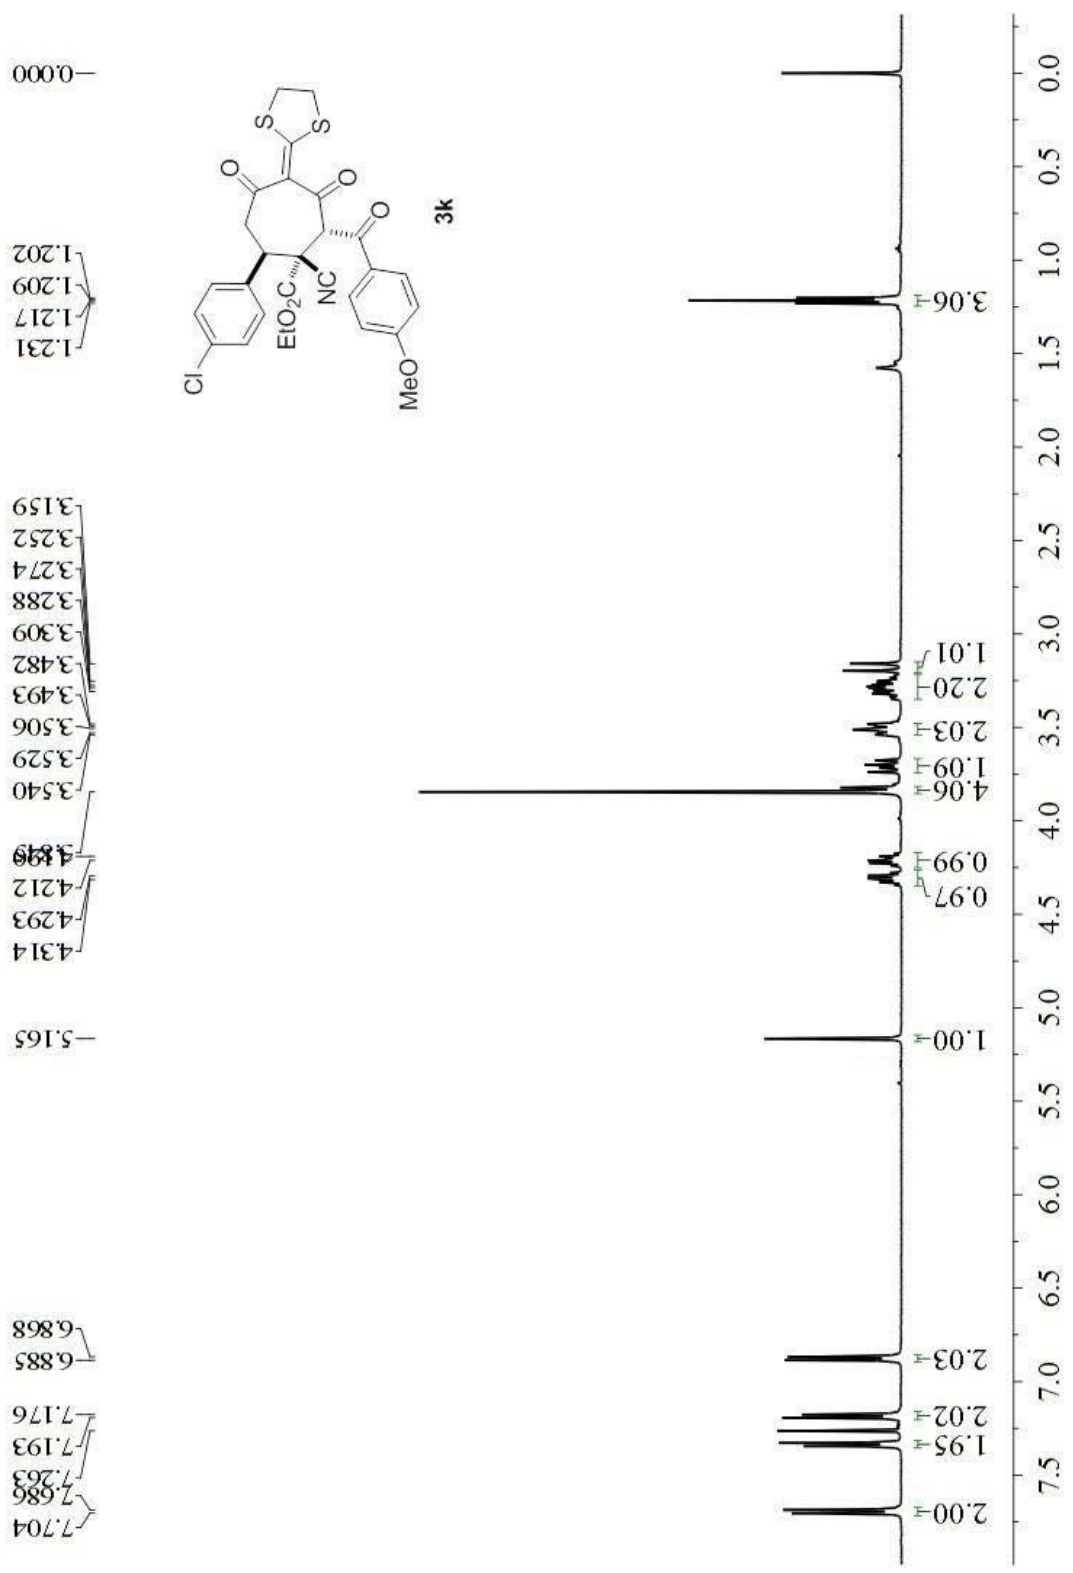

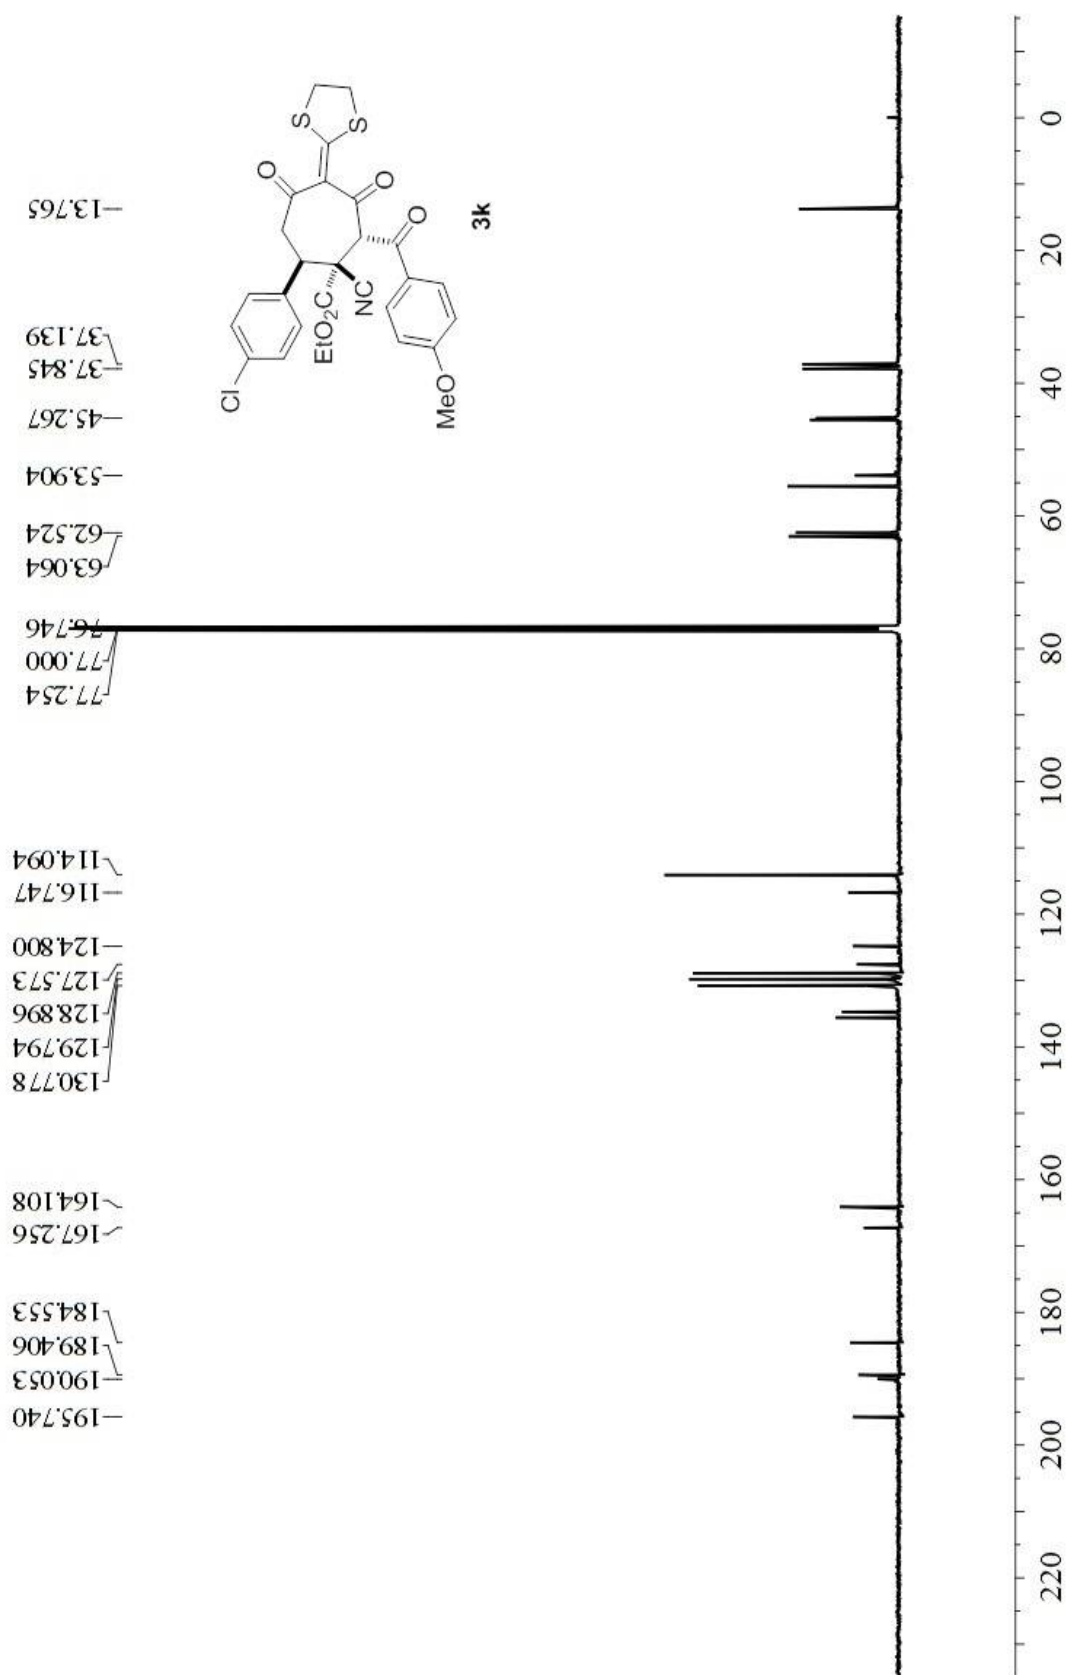

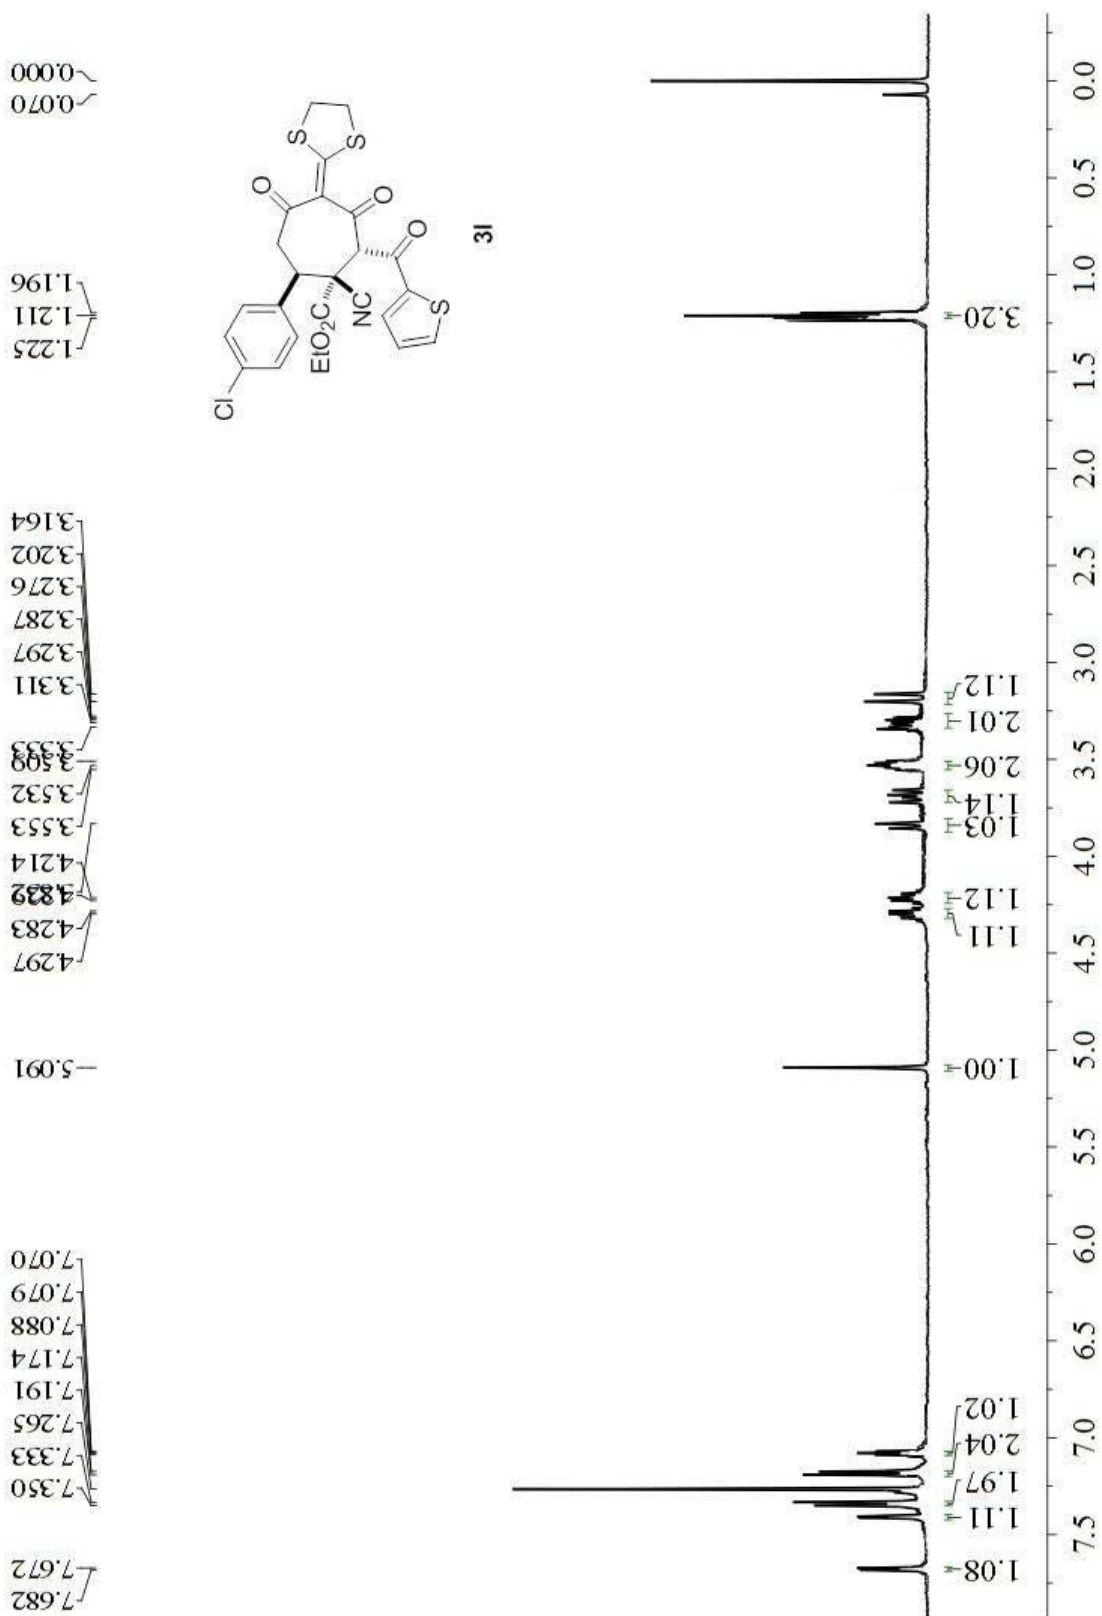

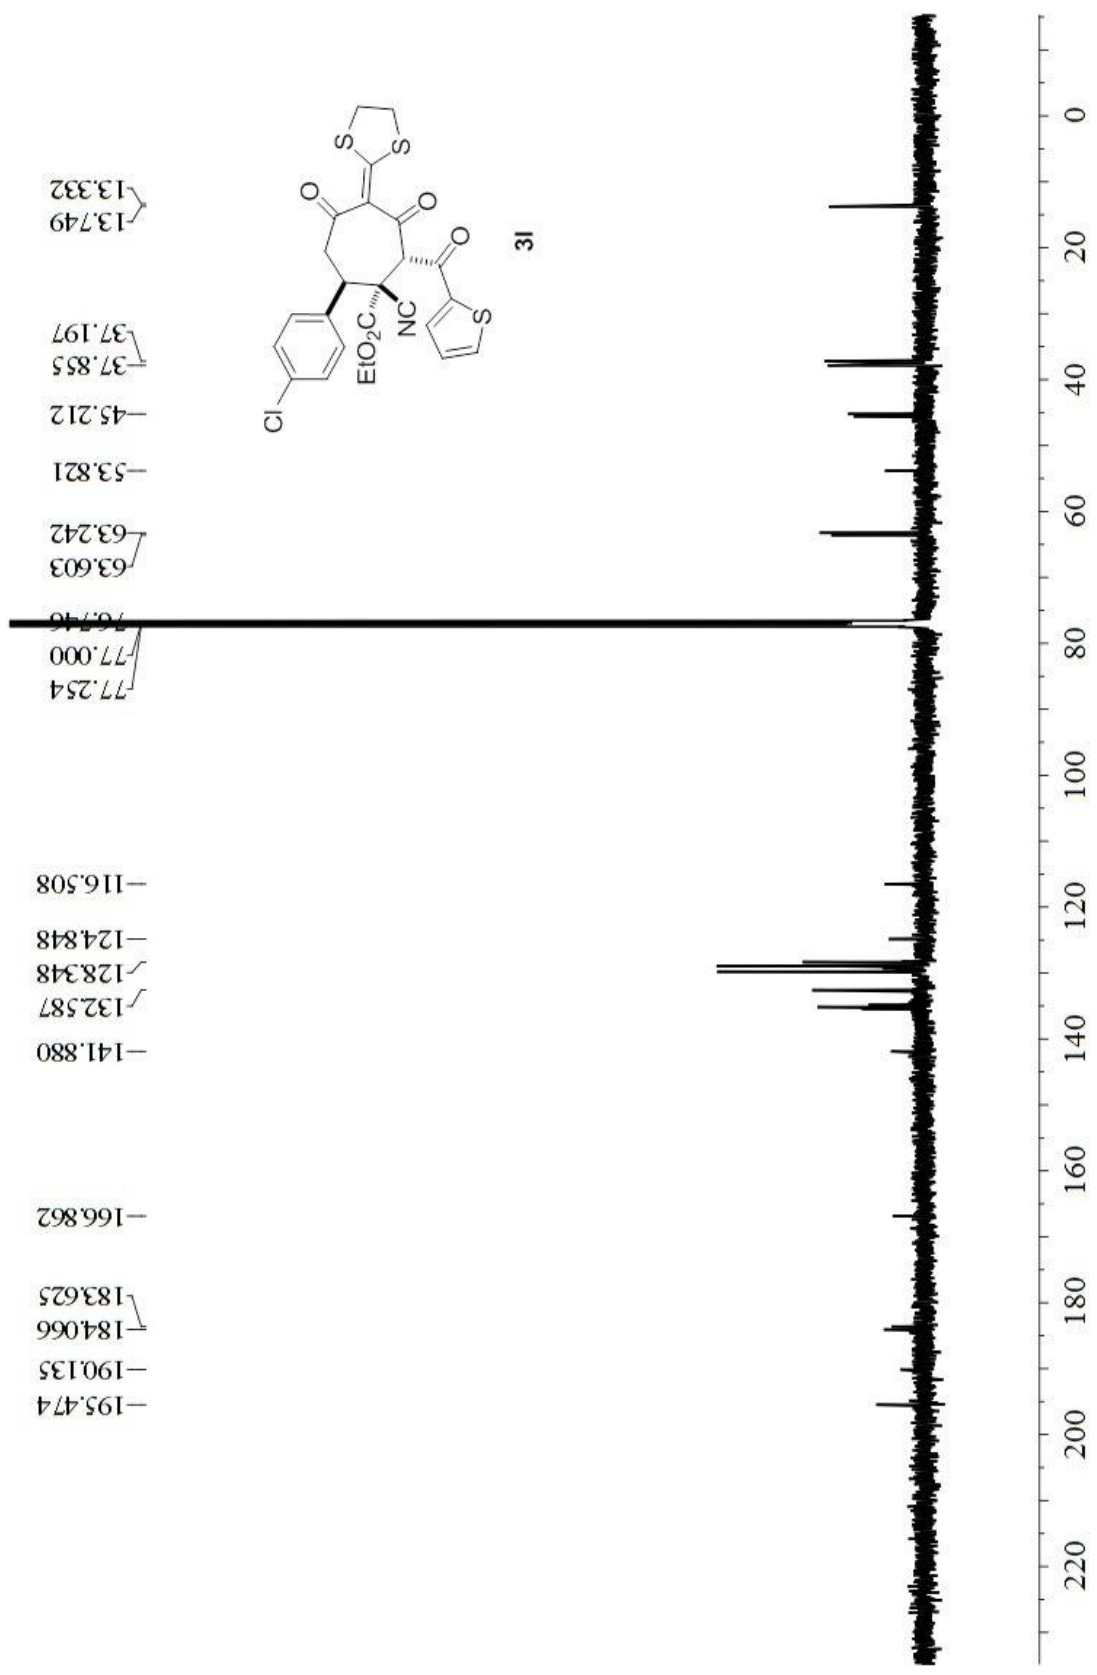

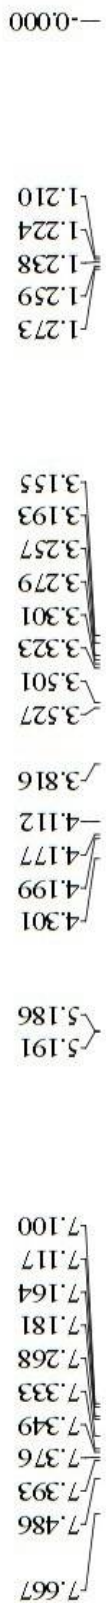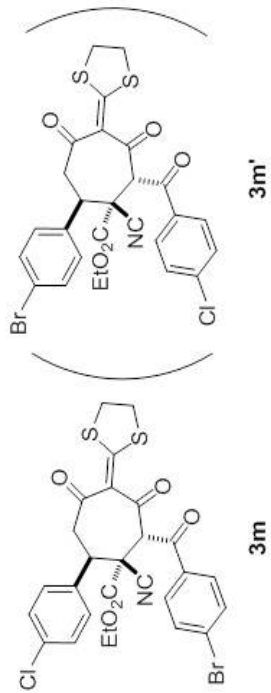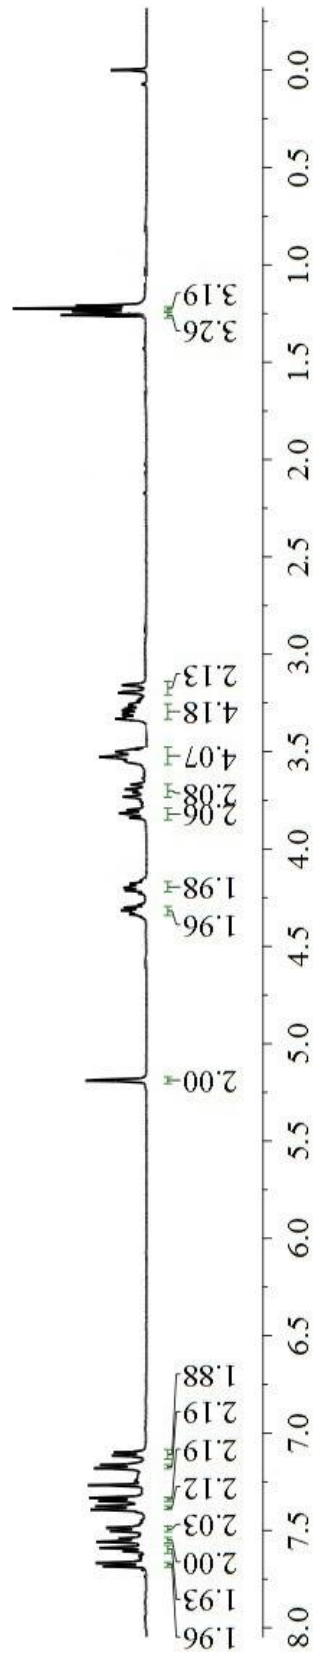

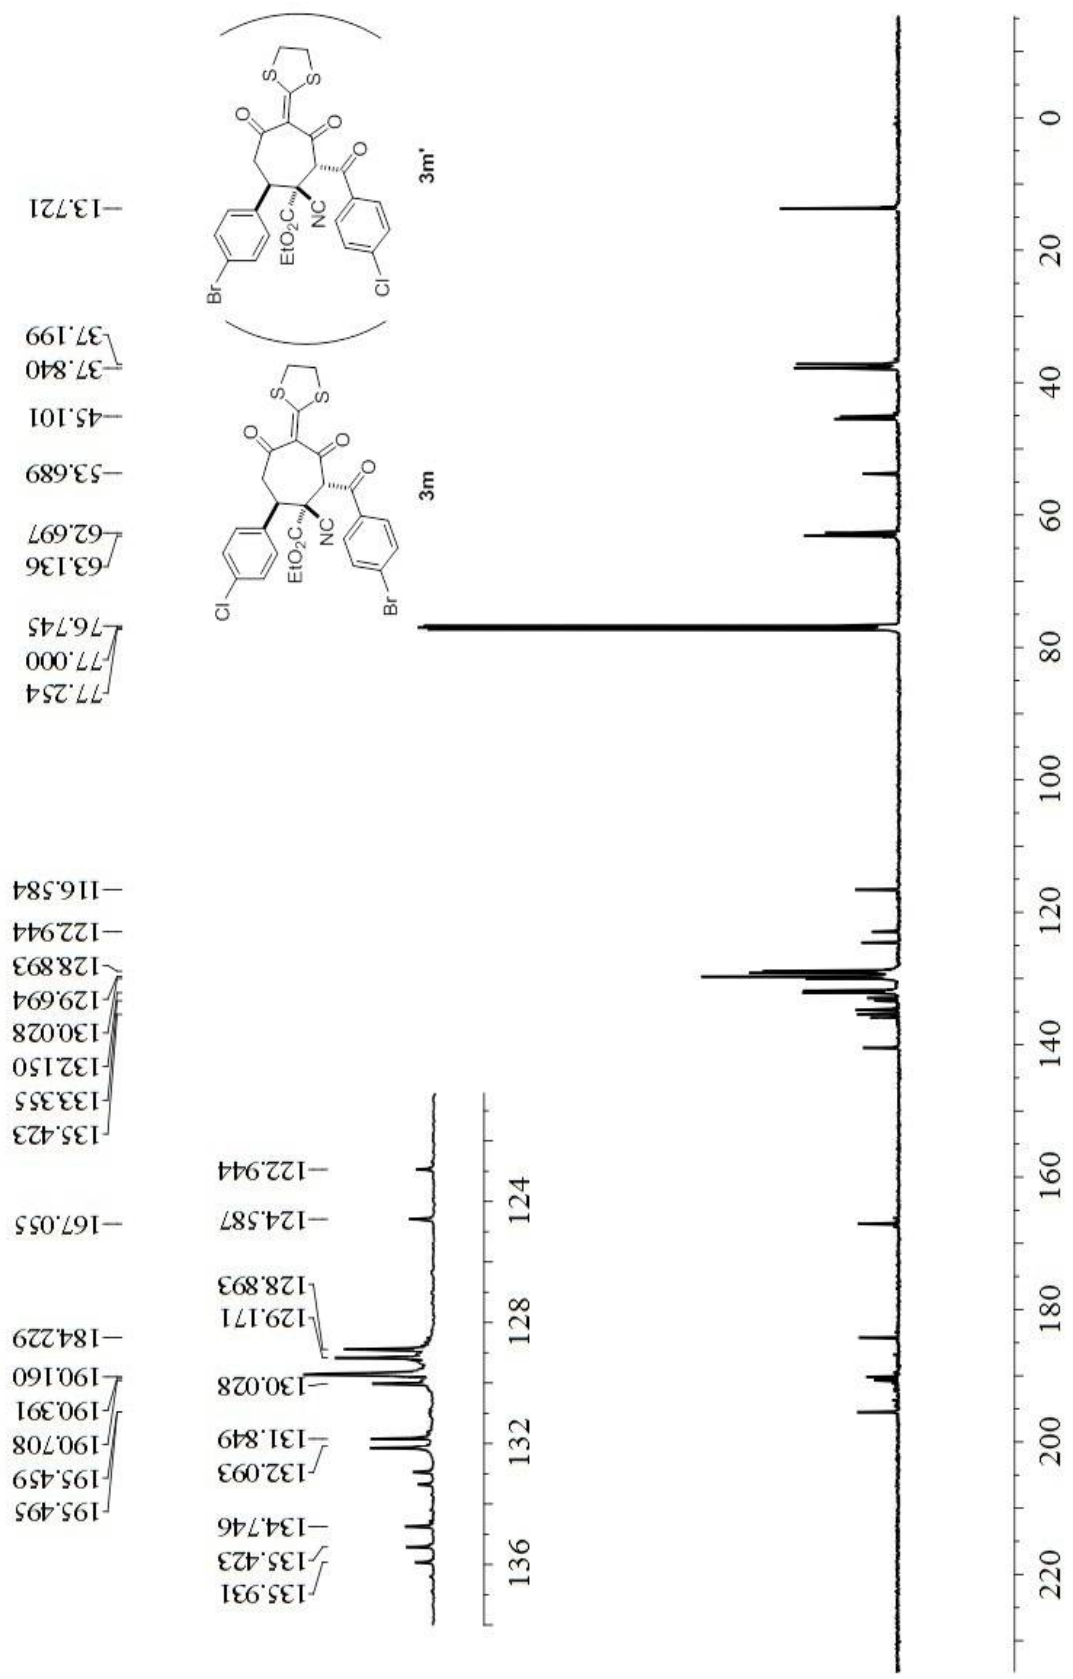

## V. $^1\text{H}$ - $^1\text{H}$ NOESY spectrum of **3k**

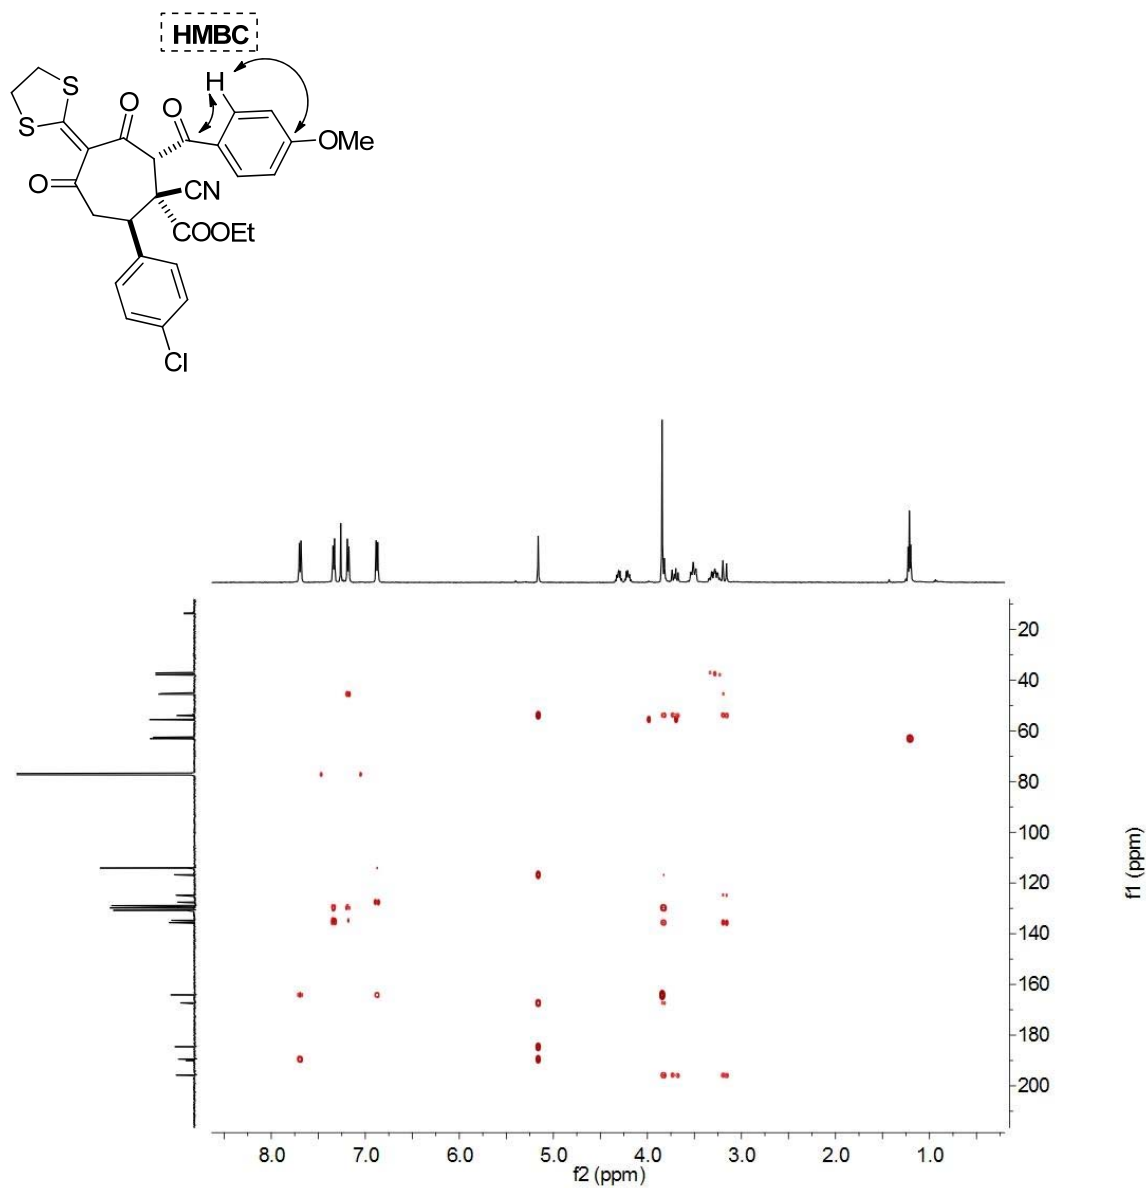

## VI. Crystal data and OTEP drawing of compound **3g**

Single-crystal X-ray diffraction data was collected at room temperature on a Oxford Diffraction Gemini R Ultra diffractometer, the X-ray generator using Mo-K $\alpha$  ( $\lambda = 0.71073 \text{ \AA}$ ) radiation with a  $\omega$  scan technique. The crystal structures were solved by direct method of SHELXS-97<sup>3</sup> and refined by full-matrix least-squares techniques using the SHELXL-97 program. Non-hydrogen atoms were refined anisotropic. CCDC deposition

number: 971669 (**3g**). Data can be obtained free of charge via [www.ccdc.cam.ac.uk/conts/retrieving.html](http://www.ccdc.cam.ac.uk/conts/retrieving.html) (or from the Cambridge Crystallographic Data Center, 12 Union Road, Cambridge CB21EZ, UK; fax: (+44)1223-336-033; or [deposit@ccdc.cam.ac.uk](mailto:deposit@ccdc.cam.ac.uk)).

ORTEP drawing:

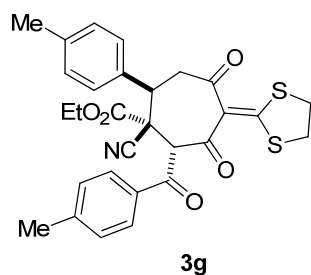

Crystal data:

---

|                                               |                                                                |
|-----------------------------------------------|----------------------------------------------------------------|
| Empirical formula                             | C <sub>29</sub> H <sub>27</sub> NO <sub>5</sub> S <sub>2</sub> |
| Formula weight                                | 574.03                                                         |
| Crystal system                                | Monoclinic                                                     |
| Space group                                   | P2 <sub>1</sub> /n                                             |
| a (Å)                                         | 24.428(4)                                                      |
| b (Å)                                         | 12.340(2)                                                      |
| c (Å)                                         | 22.946(4)                                                      |
| α (deg)                                       | 90                                                             |
| β (deg)                                       | 92.211(2)                                                      |
| γ (deg)                                       | 90                                                             |
| Volume (Å <sup>3</sup> )                      | 1455.56(7)                                                     |
| Z                                             | 4                                                              |
| Calculated density (mg/m <sup>3</sup> )       | 1.416                                                          |
| Absorption coefficient (mm <sup>-1</sup> )    | 0.250                                                          |
| F(000)                                        | 640                                                            |
| Theta range for data collection (deg)         | 2.27 to 25.12                                                  |
| Reflections collected/unique                  | 5691/2554                                                      |
| Goodness-of-fit on F <sup>2</sup>             | 1.025                                                          |
| Final R indices [ <i>I</i> > 2σ ( <i>I</i> )] | R1=0.0665, WR2 =0.1800                                         |
| R indices (all data)                          | R1=0.0808, WR2 =0.2036                                         |

---
